# Supplementary material for: A novel ferroptosis-related gene signature for prognostic prediction of patients with lung adenocarcinoma
Source: publisher site journal article supplement (doi:10.18632/aging.203140), 2021-06-11
Supplement: Supplementary file [file aging-v13i12-203140-supplementary-material-SD1.pdf]

## SUPPLEMENTARY FIGURES

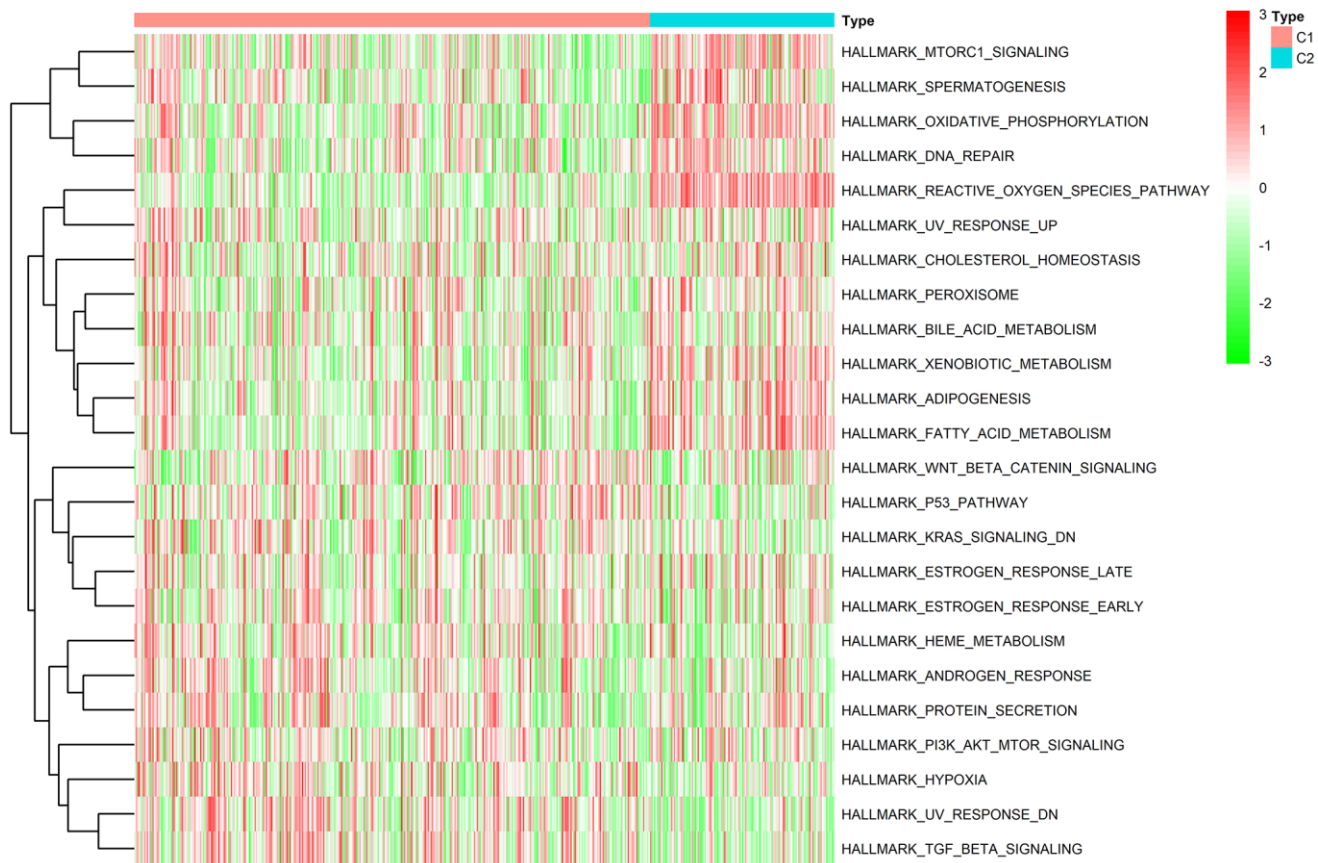

Supplementary Figure 1. Heatmaps of the GSVA results of two clusters (clusters 1/2) in the TCGA cohort.

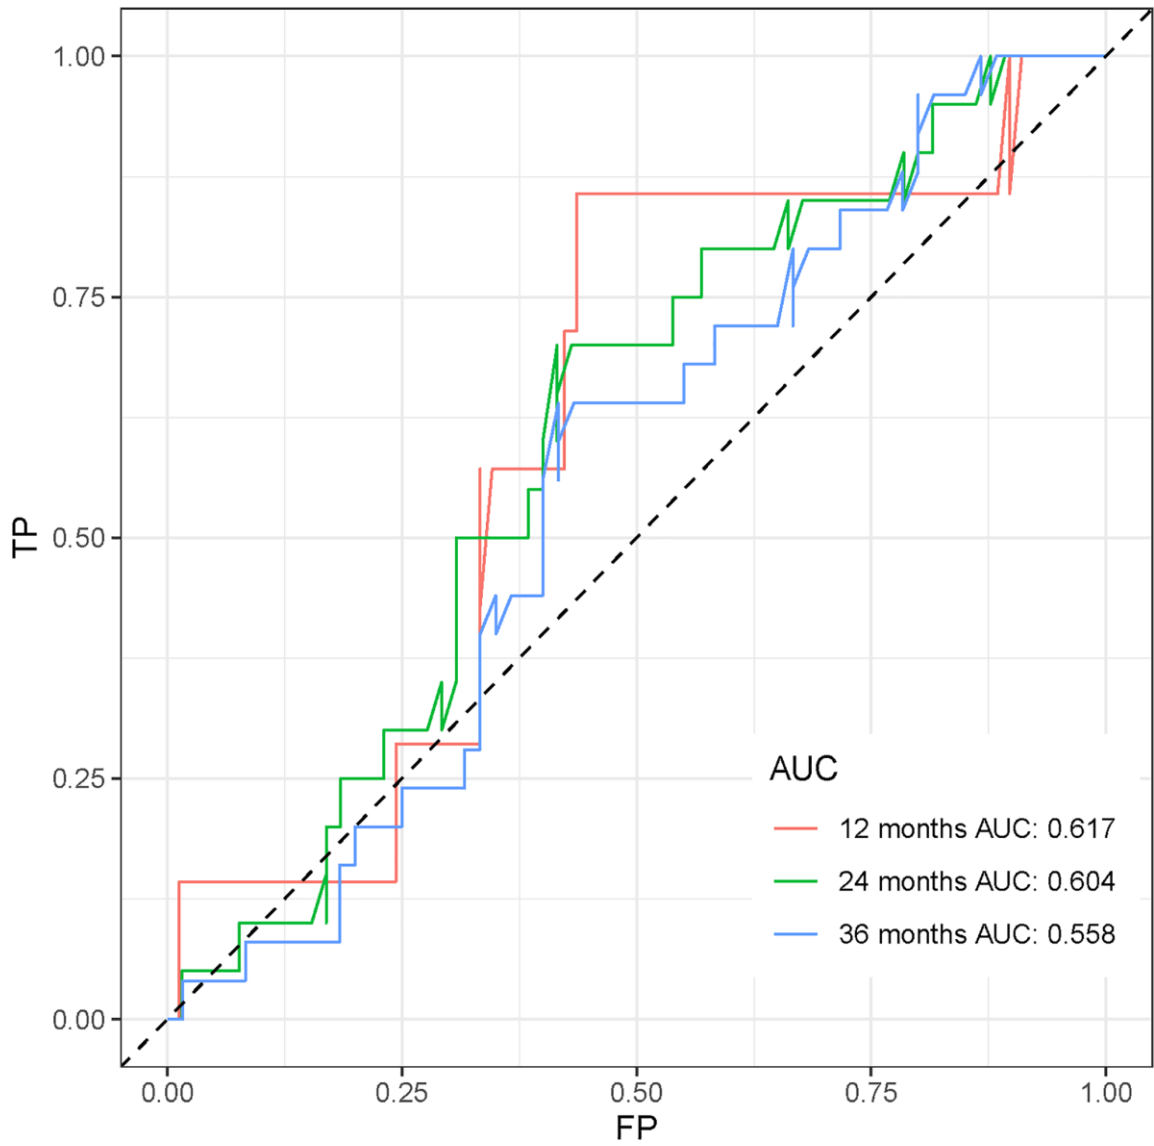

Supplementary Figure 2. The ROC curve analysis of the GSE30219 cohort.
