# Supplementary material for: A novel ferroptosis-related gene signature for prognostic prediction of patients with lung adenocarcinoma
Source: Aging (Albany NY). 2021 Jun 11;13(12):16144–64. doi: 10.18632/aging.203140 (PMC8266333; doi:10.18632/aging.203140)
Supplement: Supplementary Table 4 [file aging-13-203140-s003.xls]

id	futime	fustat	PEBP1	ACSL3	DPP4	GSS	ALOX15	GLS2	PGD	FANCD2	SLC7A11	NCOA4	GCLC	PHKG2	CISD1	ATP5MC3
TCGA-05-4244-01A	0	0	6.31979188	3.39235236	7.49171165	5.09849329	1.50680623	0.36359952	5.35204795	1.79653251	0.43154668	5.91377745	2.72818575	2.99444218	2.68066519	4.36492803
TCGA-05-4249-01A	50.03	0	7.1735679	3.684882	6.5583773	4.6904689	1.1578961	0.420744	5.3479325	1.0341271	0.2600628	6.4891178	1.9445248	2.5193917	2.8637483	4.3242068
TCGA-05-4250-01A	3.98	1	6.384356808	4.298733633	5.390669766	5.109828584	0.630585392	0.269229266	5.012493179	1.868313305	1.528270092	5.813319311	2.608825159	1.816169831	3.323563791	4.829625422
TCGA-05-4382-01A	19.94	0	5.870860464	4.186493799	3.157187341	4.99037586	0.098947899	0.142023143	6.140210122	1.274962068	0.562852852	5.808885522	3.121337769	2.445465983	2.782922547	4.528610715
TCGA-05-4384-01A	13.99	0	7.2283783	4.1743857	2.6854605	4.7229963	0.3111473	0.3269819	7.505878	1.263369	3.6468084	6.3720876	4.5812061	2.3303723	2.7385711	4.1444626
TCGA-05-4389-01A	44.97	0	7.76321963	3.644486231	3.927455128	5.163686761	1.765807642	0.812623115	7.504214442	1.306413646	4.335991065	6.722954628	4.997835223	2.294847008	4.167215601	5.227112519
TCGA-05-4390-01A	36.99	0	6.8124756	4.2228507	5.667077	5.0962381	0.7014807	0.7497249	5.2119346	1.6942068	2.444052	5.9486783	4.3325982	2.0997532	3.3849598	4.5239734
TCGA-05-4395-01A	0	1	6.1208165	5.45746173	0.52440614	5.1757092	0.03971335	0.01463608	8.26540259	1.35676441	3.93640242	5.72788107	4.51973111	1.91433152	4.78014609	4.8371469
TCGA-05-4396-01A	9.95	1	6.9125902	4.5245451	3.5611991	4.255454	0.8115375	0.288145	5.4214694	1.3461686	2.8462581	6.4927397	2.2836784	3.2629717	3.3390979	4.5943237
TCGA-05-4397-01A	24.01	1	7.81085129	3.65219072	3.37264523	5.99991807	0.37133279	0.09524562	6.15395089	2.20721309	0.9897076	5.93302897	3.14372104	3.20237703	3.38156655	6.33305378
TCGA-05-4398-01A	47.01	0	6.36254837	3.70839258	6.67600088	5.67243053	0.31082294	0.06633587	5.84830905	1.85039701	0.4474633	6.00822419	3.66592164	3.19017416	3.03718208	5.06674996
TCGA-05-4402-01A	8.02	1	6.9632015	4.325274	4.304449	5.0464125	0.7938342	0.3474221	6.9166205	1.1216954	0.763029	5.7754737	4.1585037	2.3165163	3.2341176	4.816859
TCGA-05-4403-01A	18.99	0	7.01984491	3.90419565	3.94086957	4.94287066	0.91028752	0.13578435	5.5227325	0.91762847	2.22028563	6.41209788	1.83649905	1.66332835	2.8954058	4.75627175
TCGA-05-4405-01A	20.04	0	6.8747485	3.8954081	5.8115674	5.953422	1.1815407	0.352098	5.529372	1.3938435	0.2752779	6.1002339	2.1313577	2.4419319	3.0476788	4.1920423
TCGA-05-4410-01A	0	0	6.833884	4.0347828	6.5973909	4.8982837	2.5944046	0.556138	6.0829797	1.458377	0.2275747	5.9560637	4.46752	2.1591813	2.6180033	3.8728692
TCGA-05-4415-01A	2.99	1	6.32617866	4.60859222	1.49792439	4.50311804	0.03478626	0.04978083	7.11698209	2.40895734	3.86430591	5.3725136	2.8209816	1.5781527	3.69579016	5.24760656
TCGA-05-4417-01A	14.95	0	7.0885997	4.3141109	5.1494069	4.0884756	1.3356142	0.1978098	5.6669914	0.8962757	2.152556	5.9684428	1.7986974	1.889574	3.2355148	4.5758722
TCGA-05-4418-01A	9	1	6.93772247	3.84932232	2.22827978	5.47176575	0.05000574	0.26270086	8.711335	1.53976318	4.04655728	5.82934021	5.78613912	1.98081824	4.19368571	6.54329627
TCGA-05-4420-01A	29.96	0	7.52552588	4.17899064	1.57866215	4.82163861	1.73278226	0.35252066	5.65445978	1.25931807	1.30632709	5.78838596	3.31013455	3.11676276	3.31458102	4.9361458
TCGA-05-4422-01A	11.99	0	7.746771	3.802023	3.4518869	4.1303102	0.6131685	0.8416561	5.6841376	1.8184066	2.0959016	6.3172097	3.8015803	2.438273	3.9764743	4.5718317
TCGA-05-4424-01A	29.99	0	7.7224503	4.8162001	2.4839815	4.9828599	1.8466285	0.1164096	6.1656225	1.9975878	0.7469906	6.4217431	3.1573852	2.0110589	2.7354475	4.4875714
TCGA-05-4425-01A	21.98	0	7.252788972	4.028066885	5.636684287	4.492460338	0.098494304	0.784737774	5.105840246	1.449966779	0.936842034	6.286604085	3.093794847	2.115915653	3.488460265	4.456352203
TCGA-05-4426-01A	25.99	0	6.88214366	3.28232339	6.03136901	5.24581729	0.10211368	0.76918856	5.01440478	1.41985314	0.76260901	5.77269695	3.31053386	2.09337722	3.79923481	4.34761724
TCGA-05-4427-01A	25.99	0	6.87732144	3.59055779	6.66303942	4.37630414	0.05318954	0.33265156	6.02347777	2.3466476	0.23910926	5.37043224	0.86533474	2.5489673	2.45748211	4.41278249
TCGA-05-4430-01A	25	0	7.1206539	3.4498303	4.3373877	4.2019387	3.0325169	0.2217763	5.6096755	1.0433545	0.3800512	6.1692274	2.0424854	2.0352135	3.3985502	4.7678956
TCGA-05-4432-01A	25	0	7.387726	4.6065398	3.3645325	4.7643846	1.0015664	0.3092534	6.5794509	1.0987663	1.4138381	5.8205875	2.3582218	2.570986	3.5598905	4.9960053
TCGA-05-4433-01A	23.98	0	6.20031732	4.2781591	3.33288704	4.73361567	0.85421104	0.14487821	6.40354529	1.62518051	3.8543753	6.40473497	3.37800157	1.92458896	2.43786859	4.01660248
TCGA-05-4434-01A	15.01	1	7.0521648	4.3233019	5.3503262	4.9015976	2.4137058	0.1331687	6.2201026	2.0245825	3.4548611	6.2220195	3.1452129	2.2793523	3.3666965	4.7324062
TCGA-05-5420-01A	15.01	0	7.30642195	4.32180696	2.24576941	4.89750275	0.66177351	0.18002028	6.81729932	1.5166071	1.73466602	6.92771023	2.68819651	2.25755022	3.92141112	5.68859523
TCGA-05-5423-01A	4.96	0	7.30541694	3.40640997	5.59831187	5.05312947	0.99446079	0.92663895	5.38274681	1.01202189	0.22342064	6.15167929	1.2705911	3.0461698	3.63605578	4.95928946
TCGA-05-5425-01A	28.98	0	7.2343137	4.4470474	3.8872704	5.5930434	0.2019858	0.5911914	6.122469	1.6827298	1.3926616	6.5532286	3.6783083	2.3304522	3.673986	5.6784209
TCGA-05-5428-01A	22.01	0	6.91920493	3.36140985	5.53392575	4.61958782	0.06420416	0.62869602	7.18140408	2.19291114	1.86919823	5.84326714	5.85231476	2.78316893	3.88692281	5.72211779
TCGA-05-5429-01A	9.03	1	6.64282909	4.05496772	2.23419193	4.80364947	1.15535626	0.08755831	4.34073502	1.40848196	1.43070943	6.48703043	2.15195814	1.81689979	3.40316098	5.38048419
TCGA-05-5715-01A	2.04	0	7.19488771	4.19354367	5.97960283	4.34783122	1.6346339	0.13481099	6.02312581	0.86313898	2.91376552	5.35166765	1.43584423	1.95134645	2.847863	4.68718093
TCGA-35-3615-01A	0.46	0	6.35114475	4.08871227	3.41998036	4.80720526	0.13241365	0.7800908	8.69924366	0.92584372	5.02358226	6.64135248	4.72339903	2.3298231	3.38586591	4.67704618
TCGA-35-4122-01A	7.39	0	6.2778132	2.71870367	5.79725986	4.588099	0.05314676	0.19587767	6.12863827	1.0568169	0.4023247	6.55525485	3.11310541	2.81884426	4.40355743	5.89302788
TCGA-35-4123-01A	5.98	0	6.2722003	2.7736228	5.0386739	4.9456209	0.0471424	0.393969	5.1019714	1.6242716	0.2021925	6.1446974	5.084248	2.1018599	3.6518407	5.2622154
TCGA-35-5375-01A	8.67	0	6.038396999	4.685660289	0.613440802	5.448954394	0.65318192	0.401071954	9.18207224	1.950915502	2.982118677	5.389711196	5.560634194	2.746511491	3.814009341	5.732757225
TCGA-38-4625-01A	97.67	0	7.32674883	3.50658996	4.24992044	5.47533034	0.14469907	0.19684758	6.4167384	1.79197845	0.83772817	6.11284952	4.08397597	3.08358515	4.01300988	4.56859561
TCGA-38-4626-01A	120.7	0	6.8772528	3.924506	5.2726682	4.5631305	0.3571065	0.2891299	6.3779723	0.7843687	1.05307	6.4214786	1.7834444	2.2659292	2.6295518	4.2306444
TCGA-38-4627-01A	37.68	1	7.1239701	3.7221095	4.2079202	4.7903243	1.5449868	0.13854	5.9357625	0.557278	2.1339745	5.9779534	2.7025395	1.776444	3.3037596	4.2542253
TCGA-38-4628-01A	49.01	1	7.40365882	3.47877833	5.06789603	5.47762559	0.36038324	1.02238087	6.58066975	1.26499446	0.05043824	6.15351593	2.4889115	2.56940248	3.69179761	5.18504481
TCGA-38-4629-01A	28.38	1	6.65775811	3.23841351	4.65864274	5.22391905	0.23658076	0.03049426	6.36569145	1.27463591	1.52221341	6.0697268	2.83050887	1.79586128	3.51474717	4.61678512
TCGA-38-4630-01A	35.25	1	8.11195834	3.10644819	1.21781658	4.46747613	0.36862462	0.12651054	6.08588224	2.84062693	1.24129475	5.13011572	2.55627625	2.49175895	3.19918617	5.24872164
TCGA-38-4631-01A	11.63	1	6.5655556	3.7401965	2.869513	4.8791481	0.5952065	0.3652411	8.0722577	2.3882772	3.1507132	4.961551	5.8610648	2.7366281	3.4839842	5.8791092
TCGA-38-4632-01A	44.58	1	7.1794911	3.7472723	5.2649201	4.7864658	0.1497806	0.1242355	6.2837181	2.0311267	0.3250693	5.6026057	3.0848412	2.0331069	3.893764	5.6756114
TCGA-38-6178-01A	14.72	0	6.52889325	3.68804873	4.23604141	5.14742984	0.45416458	0.19227699	6.30205887	0.90595029	1.48309294	5.82264347	2.92583441	2.67776371	3.20110552	4.05997716
TCGA-38-7271-01A	26.28	1	6.994269	3.567676	4.5580399	4.4151075	0.2616054	0.1456492	5.4356331	1.1050631	0.5865875	5.9473689	2.2709457	1.9373277	2.7812622	4.0777385
TCGA-38-A44F-01A	4.37	0	7.051862936	3.532022423	3.268712267	4.939440733	2.872090734	0.169232809	5.334473248	1.211925636	1.573923465	5.626968778	2.683948671	2.761110958	3.184398505	4.103301784
TCGA-44-2655-01A	43.5	0	7.7642439	3.7527716	2.6891045	5.4282927	0.8076017	0.5338864	7.2552225	1.0223199	3.7699236	6.2725315	4.8676361	2.3862413	3.4155183	4.7291272
TCGA-44-2656-01A	46.94	0	6.4753199	3.8423946	5.8393941	4.6527948	1.5397299	0.1986145	6.6130181	1.7161616	1.6367244	6.8597237	5.2052518	2.1704124	3.6323761	3.8786592
TCGA-44-2657-01A	44.38	0	6.91490371	3.42561543	4.48849195	4.750539	2.28176767	0.36587155	6.10216127	1.40290897	0.67904402	5.68545728	3.02937472	2.82475779	2.77326683	4.70043395
TCGA-44-2659-01A	44.91	0	7.1741935	3.2560687	6.2144323	4.0368537	0.2664944	0.2013272	5.9630092	1.1249582	1.3062448	5.8716211	1.5303364	2.6953147	2.542167	3.6495732
TCGA-44-2661-01A	38.07	0	6.6927735	2.869637	5.3725066	4.4671207	2.0539047	0.3318923	5.9005266	1.2709446	0.1975523	6.5972878	2.1903546	2.3933859	3.254389	4.9456291
TCGA-44-2662-01A	42.05	0	5.5313839	4.9050325	5.32456382	5.39568106	0.17349346	0.02397824	6.7540937	2.38129749	1.517544	5.60296442	3.35252909	2.45421373	3.15755596	4.07843515
TCGA-44-2665-01A	42.74	0	7.0458633	3.0719404	5.3236288	4.3337796	0.150342	0.152873	5.8048948	1.3726773	2.0750682	5.8841747	0.885791	2.730765	3.7341312	4.3601108
TCGA-44-2666-01A	3.19	1	6.9104231	4.0094072	6.0870726	4.7394592	1.2662837	0.9928846	5.3313992	1.8523076	2.8821869	6.1885832	3.7028535	2.7487546	3.3606666	4.2395119
TCGA-44-2668-01A	25	1	5.88513147	4.49369998	4.87323141	4.60782477	0.28832766	0.06612686	5.75630488	1.54703036	1.48214809	6.10596738	3.60831361	1.99233873	2.97766628	4.61573228
TCGA-44-3396-01A	37.12	0	6.85238594	3.668922282	3.11749695	4.780024383	0.769965084	0.214692692	5.986765926	2.264319	1.027802916	5.734071021	1.565116147	2.649612082	2.652849358	4.466825018
TCGA-44-3398-01A	38.21	0	6.51348566	3.22489307	5.42296917	4.35404219	0.59309287	0.18982946	4.96288497	1.27449227	1.75554501	6.06851484	2.06502147	2.41589265	3.48506542	5.31206648
TCGA-44-3917-01A	38.86	0	5.8063182	4.36179577	5.71317454	4.70527368	1.10714323	0.60170622	4.73343441	2.83829686	3.26783988	6.66116192	3.29145486	2.31374145	4.29937402	5.04980824
TCGA-44-3918-01A	34.03	0	5.9466294	3.7427978	5.6758203	4.5636368	0.5873114	0.4041936	5.1462119	1.8788558	0.8612027	6.471692	3.017426	2.9343977	3.1783673	4.5407328
TCGA-44-3919-01A	33.71	1	6.75126022	3.73521058	5.00885003	5.27874685	0.22243255	0.43065669	5.89192627	1.37918392	1.26661062	5.54547794	2.60862835	2.64409651	3.06244248	4.28972809
TCGA-44-4112-01A	26.54	1	6.25335915	3.76815612	5.17803976	4.94813129	0.07367424	0.19715274	5.22183464	1.92493209	1.51051551	6.19928289	3.72771191	3.31289185	3.33650131	4.9722373
TCGA-44-5643-01A	33.28	0	7.83633662	4.63765188	0.84119094	5.29970196	2.61015623	1.07156615	6.73460748	2.2201661	1.4120615	6.73743101	3.89043259	1.91878726	4.38042031	5.80974615
TCGA-44-5644-01A	28.35	0	7.205234	3.6828183	7.3726079	4.3848371	1.8754952	0.725041	5.6652429	2.1643077	2.4675502	5.0722175	3.9095718	3.2157191	3.5735652	5.0083228
TCGA-44-5645-01A	27.99	0	7.23514927	4.13178266	3.17185979	4.50841435	0.41129029	0.59353623	5.30970892	1.41561574	1.39026439	6.20107996	2.27541478	2.31317944	3.20323309	3.62118331
TCGA-44-6145-01A	19.55	0	6.67575107	3.81556632	2.94957222	4.90360057	0.93539323	0.08092252	8.22984421	1.20676575	4.04251036	6.15122974	3.666914	2.33135137	3.42098705	4.25575468
TCGA-44-6146-01A	23.92	0	6.97797804	5.22582761	2.04974853	4.69269155	0.17427969	0.16414758	6.07034737	1.17138613	4.01849537	6.47940572	2.75053799	1.97645252	2.44698938	3.82791378
TCGA-44-6147-01A	27.76	0	7.1597999	4.1644544	5.2382518	5.3365775	4.7566019	0.2110205	5.0755666	1.3482579	0.780236	6.2518435	3.1072943	2.7029467	2.9946639	3.6279742
TCGA-44-6148-01A	23.13	0	7.56640441	3.98450356	3.34584692	4.65349943	4.2330441	0.62699423	5.08182581	0.87051979	0.32433968	5.76962031	2.23143081	2.07878603	3.1406029	3.83856524
TCGA-44-6774-01A	21.62	0	6.8409024	3.7267929	4.2445759	4.7027426	0.2567527	0.1666434	5.5090397	1.1594265	1.3337067	5.4047976	2.8017434	1.8384733	3.1937885	3.8881498
TCGA-44-6775-01A	23.16	0	6.14878381	4.44707683	3.88349278	4.83984397	0.8530244	0.15835345	6.27833201	1.95328775	1.73492868	5.95563021	3.76493826	2.52895149	3.15741449	3.82824671
TCGA-44-6776-01A	85.94	0	6.6213406	4.9581951	3.8989187	4.5349484	0.5385223	0.4871866	7.9554747	0.5013019	3.887605	6.1885192	3.4245102	2.3855686	2.8218022	4.2614294
TCGA-44-6777-01A	32.42	1	6.5737034	3.5922468	5.5979226	4.1554824	0.1071666	0.1379789	5.5171091	0.9066108	0.6417008	6.0118947	1.7899318	1.6816996	2.7920002	3.7282653
TCGA-44-6778-01A	61.24	0	7.2346529	3.6562864	3.1943931	4.3761412	0.2852869	0.4270665	6.7687254	1.6858387	1.4471308	6.5273578	3.6454358	1.9994173	3.0764824	4.3040512
TCGA-44-6779-01A	16.43	1	5.926539	3.8285842	1.0800796	5.6486656	0.0157876	0	7.4563256	1.6431872	2.740978	7.2133058	4.0244262	2.1233123	4.2804006	4.1138132
TCGA-44-7659-01A	22.7	0	7.7236816	3.6588082	6.60976	4.5058362	3.0506764	0.5379075	5.0505098	1.5463418	1.3416439	5.9455112	2.4107454	2.9356726	2.7217642	3.8361637
TCGA-44-7660-01A	19.45	0	7.3980574	4.765024	0.5337579	5.2182347	0.9991367	0.565983	7.6756477	1.8707522	4.1792883	5.1391755	6.2716122	2.3852499	3.4562845	4.3576287
TCGA-44-7661-01A	18.3	1	6.383116061	4.225276251	4.638859143	4.673613396	0.116009696	0.114496103	5.210517699	2.227887335	1.136407418	5.577463805	2.783905638	1.700005619	2.852065611	4.304214172
TCGA-44-7662-01A	7.16	0	6.16313705	3.77856703	3.59155141	5.31914159	0.53481382	0.14025874	5.49796169	1.95296758	0.83120168	4.96688538	3.02805738	2.57937127	2.89991471	4.21268943
TCGA-44-7667-01A	36.04	0	7.4500151	4.4704987	1.7778938	5.0336815	1.2870699	0.585118	6.6687611	2.0517899	2.1294308	5.447195	3.1881486	1.694554	3.9936154	4.7811399
TCGA-44-7669-01A	18.86	1	7.0108683	3.9699312	2.4191817	5.073518	0.5140896	0.5729201	7.5826695	2.9025111	3.3581201	5.5800585	5.0013394	1.972734	3.5353401	5.4067863
TCGA-44-7670-01A	28.98	0	6.94064672	3.836675165	4.508472505	5.081354938	3.570506304	0.696228244	6.78357189	1.96353222	4.596244472	5.103534082	5.654418086	2.402053239	3.054129162	5.425632489
TCGA-44-7671-01A	29.2	0	6.9267707	4.9838621	5.2792942	5.4358329	3.1735528	0.2517829	8.0920246	0.9699061	4.5846272	6.1287972	5.4091966	2.1526669	2.8957558	4.3494007
TCGA-44-7672-01A	23.62	0	6.89164759	3.27596827	4.74798727	5.04861538	1.72434588	0.19786455	5.9231983	1.48105372	0.58967094	6.02605251	1.7881689	2.27230551	2.78380397	4.37125769
TCGA-44-8117-01A	12.65	0	6.66473222	3.06903721	5.47478803	4.90831113	0.06877716	0.24894295	5.46473526	1.21888229	0.22610719	5.44945847	2.53029655	2.1431421	2.80387875	3.59168298
TCGA-44-8119-01A	9.36	0	6.82085501	4.17908636	1.52979091	3.73810237	0.42376831	0.53403965	5.82811754	1.5357696	2.70071964	5.34377436	1.8538105	1.89087032	3.23415322	4.03805475
TCGA-44-8120-01A	8.54	0	6.5933605	3.97992895	5.13989191	5.26588107	0.07467629	0.32029029	5.42197059	1.09917941	0.38647905	5.51514919	2.28418144	2.77498105	3.01163893	4.57105331
TCGA-44-A479-01A	15.97	0	6.8932755	4.22784371	5.11715644	5.23891545	0.61328732	0.18990289	5.58947547	1.5897457	1.77235456	6.19715072	3.43664015	2.65910462	3.35124625	4.34230289
TCGA-44-A47A-01A	15.31	0	6.9281606	3.3452496	6.5256849	4.9982557	1.1939838	0.7301655	5.4073348	1.6185849	2.3803635	6.1002343	1.3850705	3.0391268	2.7364402	4.399568
TCGA-44-A47B-01A	9.43	0	7.378053108	4.579005076	5.185688562	4.842485347	0.008373312	0.315017987	4.991407438	1.677827861	1.290572404	5.563693489	1.13512884	2.940837038	2.999581772	4.088726329
TCGA-44-A47G-01A	11.53	0	6.81025432	3.44814507	5.53082407	5.04714902	1.61915057	0.21793901	6.01658217	1.81048073	1.26319205	5.10862134	4.26668453	2.92880118	3.16308094	4.53693005
TCGA-44-A4SS-01A	13.63	0	6.52326606	4.3097923	2.50910306	5.16901422	0.09207744	0.0172646	8.3196908	1.98345403	4.56704472	5.16490184	4.29254773	2.61009396	2.99159886	4.58429197
TCGA-44-A4SU-01A	13.44	1	6.7836219	3.5190837	4.1897194	5.5664763	0.6527266	0.2524458	5.5407878	1.2948507	0.8874116	4.7844664	3.2269579	3.5235502	2.3603675	3.8949507
TCGA-49-4486-01A	76.15	1	8.0784474	4.4831142	3.2416305	5.1537575	0.2687636	0.520902	8.3528908	0.5988001	2.254395	5.4358398	4.1973967	2.3884931	3.4307722	5.1530739
TCGA-49-4487-01A	28.09	1	6.91514334	3.64995124	2.51705874	4.69055277	0.04780508	0.07777582	6.35629648	1.98764721	1.0497352	5.54990063	2.93188872	2.5184132	3.55556267	4.2283525
TCGA-49-4488-01A	28.55	1	7.2397802	2.9650694	6.045166	4.875334	0.8343415	0.3154913	6.4145597	2.0260158	3.1564692	5.609605	6.3452895	3.0321542	3.5278494	4.7416316
TCGA-49-4490-01A	12.65	1	5.97438908	3.22228014	4.11053038	4.7797545	0.5073679	0.24676998	6.03325322	0.84728352	0.68041606	5.0363433	2.62990666	3.08997688	3.11880755	4.30423498
TCGA-49-4494-01A	35.51	1	6.7236388	2.9127424	3.7815766	5.6259754	0.1374068	0.3109891	5.8604588	1.2379665	2.1533499	5.2086703	0.8715973	1.8368639	3.1351322	5.0409063
TCGA-49-4501-01A	46.68	1	7.45022627	3.58066352	6.99731318	5.30688199	0.15461359	0.42130736	6.42753981	0.79863317	0.50030305	6.2022153	2.13810812	2.43648667	3.33426687	4.58066406
TCGA-49-4505-01A	14.06	1	6.91421345	3.22826704	5.32840808	4.46874144	0.99665348	0.26267346	5.55708707	0.57075762	1.2488957	5.70610833	1.79719204	2.17128249	3.65789117	4.72959097
TCGA-49-4506-01A	32.82	1	6.38928032	4.71575785	0.73988645	4.05191417	0.04169523	0.05543004	7.27784062	1.18194503	3.68609367	5.56826366	3.85577109	1.86403528	4.19499394	6.1339304
TCGA-49-4507-01A	8.8	1	6.9278453	4.24852279	0.56562471	5.71422227	0.02310693	0.09717618	7.36252583	1.48325171	3.56881814	4.80984668	3.129657	3.1572209	4.33992702	5.38717342
TCGA-49-4510-01A	29.43	1	7.4399443	4.0189616	2.0079335	4.1676386	1.4082789	0.4298146	5.8562571	0.8253283	1.3940148	5.721258	1.6357195	2.4393638	3.0499218	5.1048323
TCGA-49-4512-01A	29.73	1	7.79819491	2.90180402	4.85697206	5.64363973	1.42211022	0.29594295	5.43525178	0.94811861	0.36396708	4.31429623	1.31697981	3.37246004	2.95010341	3.98667565
TCGA-49-4514-01A	55.85	0	7.84265532	3.25961607	3.04499004	5.52734509	1.03690652	0.05023754	8.32755684	1.0751408	2.9986115	5.11208846	4.47148041	2.62543672	3.65621654	4.98514212
TCGA-49-6742-01A	16.03	1	6.95559856	4.14436123	4.0143449	5.73076413	0.5346458	0.18685645	8.76924831	1.56895983	3.51923445	5.49766102	5.90129919	2.22175834	2.57948827	4.82528167
TCGA-49-6743-01A	53.25	0	7.12312097	5.23304488	2.68785375	4.92082007	0.07289051	0.23447807	7.71022992	1.71633776	2.77280212	6.22776237	6.82530505	2.44093425	3.87410959	4.0579174
TCGA-49-6744-01A	55.29	0	6.58705417	3.61954498	5.27998605	4.52091315	0.07696667	0.30624747	6.47711916	1.12249837	0.86164245	5.86002744	2.45847264	2.13346885	3.40009466	4.39736038
TCGA-49-6745-01A	17.15	0	6.3295459	4.0550272	5.428014	4.9324755	1.1190202	0.3896351	5.7302744	1.4076028	0.8583775	6.3560382	2.8428323	1.4735679	3.1415248	4.3945988
TCGA-49-6761-01A	11.63	0	6.28074391	3.45805827	6.02263982	4.77721841	0.29513066	0.27379957	5.09197714	1.16083555	0.65113953	5.01827317	1.57504236	2.02232439	1.93491939	4.50775776
TCGA-49-6767-01A	22.24	0	7.89918753	3.48892221	6.10604778	5.52950898	0.22312689	0.13256975	5.25194687	1.70770733	0.47160801	5.62685004	4.97030802	1.87089712	3.10311773	4.32974672
TCGA-49-AAQV-01A	22.24	1	7.2610197	3.4089903	5.0103745	6.0558131	1.6241692	0.1694649	6.4856094	1.4615149	1.0726726	4.9760333	2.2600889	3.2514581	3.5188138	4.8952058
TCGA-49-AAR0-01A	156.54	0	7.4805124	3.6445745	2.4509093	5.2243346	0.829533	0.7791146	8.5244232	1.3737536	2.8686203	4.8912131	4.0174722	3.1817494	3.2588201	4.9702785
TCGA-49-AAR2-01A	73.06	0	7.69505886	2.670053697	1.947272515	5.6212903	0.524907224	0.225393166	6.62807349	1.374942062	1.683416217	4.03195866	4.675498305	3.917332136	3.022187779	4.229353645
TCGA-49-AAR3-01A	62.19	0	6.9489337	3.474704	3.9020496	5.4148794	0.2058473	0.0947536	6.6789694	1.5727971	4.2899231	4.9485772	4.5937434	2.9329659	3.2696863	4.1750485
TCGA-49-AAR4-01A	28.88	1	6.8031816	3.3276232	3.777759	5.0685425	2.7348477	0.1114319	5.6309401	1.8828732	0.7458699	4.6129706	2.50388	3.5740713	2.4888278	4.410967
TCGA-49-AAR9-01A	8.54	1	7.13477072	4.64249283	1.56462424	5.71144687	0	0.06412338	8.69767495	2.48804851	4.08736019	4.93891419	7.0550865	2.52032586	2.65854504	4.628783
TCGA-49-AARE-01A	40.37	1	6.78944861	4.33502179	0.76123203	5.85080008	1.51742503	0.07659422	7.662457	1.4532824	3.82319383	4.65714902	6.21620472	3.28468761	2.66923505	4.57648447
TCGA-49-AARN-01A	37.29	1	6.7281217	3.2755497	5.7943789	5.6460259	1.7079802	0.1906934	5.040013	1.2049264	2.1626019	5.2713654	3.1760188	3.2879273	2.8751209	4.4119653
TCGA-49-AARO-01A	123.49	0	6.8270571	3.0800385	5.1698899	5.266617	3.9202688	0.1476188	5.1901522	1.5584067	0.5986226	4.8713902	2.5049683	3.3097285	2.8718232	4.1838669
TCGA-49-AARQ-01A	221.16	0	6.88759	2.5811272	3.7350556	6.4505851	0.3241159	0.1718984	5.3581026	1.9076518	1.2392092	3.3342621	5.1655146	3.4928948	2.1488579	3.8743683
TCGA-49-AARR-01A	163.99	0	6.8621198	3.6886411	2.7730666	4.5911457	5.4488594	0.2480603	5.3512692	1.0592025	0.4700135	5.515962	3.0163944	2.6092656	3.0019048	3.8410989
TCGA-4B-A93V-01A	9.86	1	7.6458248	4.4636905	0.4975136	5.5382952	3.2543633	0.215551	7.193464	1.9359809	3.0524349	4.807784	3.6449833	3.309822	2.8380825	5.2003193
TCGA-50-5044-01A	20.5	1	6.83387345	3.05298303	2.27011428	5.02972414	0.68196533	0.04859876	5.91351219	1.10249392	1.80151236	4.86049524	0.92996788	2.04173498	3.54857179	4.83555753
TCGA-50-5045-01A	71.42	1	7.54603505	3.10047833	3.81711591	4.77615006	1.47605417	0.07884192	5.49284384	1.30535542	0.78687842	5.74740274	2.66649876	2.67362656	3.42133174	4.69965404
TCGA-50-5049-01A	101.64	0	6.9179823	3.7241437	3.3410899	4.8800655	0.9773223	0.2037549	5.6270089	1.2590138	0.4330249	6.3051829	3.0219057	2.2374486	3.6964793	4.6578121
TCGA-50-5051-01A	15.7	1	8.3491618	3.8564942	2.3389674	4.4402827	0.983656	0.2994033	7.1831892	1.2746717	3.4687695	5.5540442	2.7776508	2.9027343	4.1884016	4.6590703
TCGA-50-5055-01A	60.12	1	7.096384315	3.207869152	2.79333178	4.739215042	2.417510028	0.138059728	5.672516323	0.994749488	0.594124254	5.702581289	2.430597605	2.305131621	3.753972518	4.88802941
TCGA-50-5066-01A	47.37	0	6.7455192	2.9135822	2.9834971	4.8385143	0.1506531	0.1678513	7.202028	1.7068981	2.7675433	6.4161617	4.2063121	2.0587526	4.2652356	5.4848965
TCGA-50-5068-01A	49.24	1	6.805572	3.6618781	5.405887	4.8968219	0.4946384	0.597103	4.7233353	1.3048352	0.5007688	6.3319005	2.6318162	2.4163602	4.7881224	5.7827403
TCGA-50-5072-01A	8.21	1	7.28685774	4.38817623	2.94344553	5.11597637	0.11570989	0.0623004	8.55088579	2.02610748	4.32672048	5.18080787	5.77223408	1.86465756	3.3984263	4.95829651
TCGA-50-5930-01A	9.26	1	6.80712799	3.86488695	1.78321508	4.25799288	0.78403628	0.07580682	6.4658693	1.35236147	1.14799886	5.28933467	3.10146328	2.39967889	3.38165843	4.22010167
TCGA-50-5931-01A	14.26	1	7.885048	3.8914028	0.518717	5.3995953	0.2637572	0.6474457	6.6105003	2.0897176	1.6433672	4.7489777	5.3734861	2.6357654	2.8653171	4.9503146
TCGA-50-5932-01A	40.57	1	6.96897318	4.67370955	4.42155269	3.52613393	0.06945333	0.38051679	5.18965917	0.92562152	0.5035996	6.24293857	2.2382871	2.09226953	2.39063824	4.16241081
TCGA-50-5933-01A	78.61	1	6.236255	4.5133497	6.3849425	4.5525229	0.3100543	0.1158473	5.4119053	1.79892	1.6907425	6.0257536	6.9864115	2.3468875	3.2558656	4.0623595
TCGA-50-5935-01A	21.45	1	7.87241266	4.13096638	5.93183121	4.36928043	0.38439865	0.53065728	5.00430957	0.74584893	0.39399606	5.72809933	1.31480584	2.38279615	2.74321708	4.20817532
TCGA-50-5936-01A	8.44	1	6.93060981	4.5257764	3.09172619	5.95187157	0.04476889	0.07288367	8.12988809	2.02168826	3.56445962	5.87826401	5.46001888	1.99327059	3.62390048	4.5762315
TCGA-50-5939-01A	15.11	1	6.78902718	4.7726509	2.01091408	5.37439307	0.20429918	0.07684649	7.32014159	1.24808428	5.55702179	5.49911351	3.39802065	2.03830226	3.08349776	4.40514152
TCGA-50-5941-01A	48.42	0	6.82864418	3.74398405	5.14987891	5.4393233	0.35197695	0.14596191	6.22282124	1.43376707	0.92291299	6.10053349	3.13757546	2.22028311	3.25226476	4.44252444
TCGA-50-5942-01A	60.68	0	7.3229294	3.7559563	6.0175672	3.9622412	4.3787847	0.5530008	5.0089002	0.7965584	1.5889719	6.2633923	1.2495622	2.0125228	3.0137878	3.7333111
TCGA-50-5944-01A	57.49	0	7.9582068	3.9517303	5.5442222	4.0619495	1.5751896	0.6589348	5.3246228	0.5963391	1.7654994	5.8901535	2.0489248	1.7930076	3.6029597	4.0339394
TCGA-50-5946-01A	53.12	0	6.70694327	3.26605625	5.40011093	5.4247345	1.13279378	0.55788458	5.44123434	3.07329416	0.19338881	5.53121016	3.30910348	2.40486312	3.0486689	3.6113138
TCGA-50-6590-01A	42.31	1	6.43987841	3.4880133	4.02945737	4.89275321	0.22899865	0.03662302	5.63650353	1.5948023	1.77871745	5.8048588	3.11143487	2.32143862	3.17927354	5.23309224
TCGA-50-6591-01A	3.91	1	6.32668106	3.42646884	2.94022711	5.15278776	0.02356385	0.11265905	6.62427284	2.22544359	1.38558231	4.35224467	2.30383293	1.88406553	2.30557713	4.44771955
TCGA-50-6592-01A	25.53	1	6.3490327	5.17458795	3.5502334	4.90364631	0.08071517	0.19144014	7.5018779	1.89038697	4.25785876	5.22437744	6.71247251	2.18427189	4.15910843	4.27604791
TCGA-50-6593-01A	11.04	1	7.1078038	3.6457553	6.6616762	4.9023525	3.1339708	0.3020528	6.3271498	1.4434682	0.2666549	5.7926149	3.3866083	2.6968488	3.7105065	4.6421595
TCGA-50-6594-01A	12.16	1	6.4470179	3.6839317	6.4638139	6.4145376	0.7050564	0.2164728	5.8476175	1.3963519	1.4064085	5.963502	3.4770778	2.9187469	3.4696325	5.1292319
TCGA-50-6595-01A	6.21	1	5.9370085	4.59669431	2.09407959	4.95093186	0.50841177	0.02030684	5.74745502	1.69534062	1.36528378	5.66283251	1.92944172	1.83034575	3.68885308	4.14644289
TCGA-50-6597-01A	41.66	1	8.42679779	3.21181199	4.82373173	5.23554704	1.03820892	0.22394944	6.26469186	0.50080781	0.24602674	4.63355817	0.4742693	2.91101254	2.89102605	4.73264921
TCGA-50-6673-01A	0.72	1	6.86988719	3.70993417	8.0230637	5.1643349	1.94933366	0.19791254	5.86882714	1.3592789	0.76303149	6.07257398	3.12866083	1.727258	2.9000694	4.85484534
TCGA-50-7109-01A	10.12	1	7.83967667	4.57432081	1.85162858	4.55273997	0.86727076	0.15809813	5.35026476	1.95795216	1.57964928	6.04160068	2.87992323	2.51357261	3.63594227	4.36488844
TCGA-50-8457-01A	36.96	0	7.61494841	3.63963646	6.5444892	3.96036187	1.83780683	0.82306996	4.55102233	1.01914596	1.20025546	5.52235385	1.56018278	2.57606268	2.47477423	3.92184422
TCGA-50-8459-01A	36.76	0	6.94220165	3.40431257	2.36174366	4.45176512	2.70757794	0.07434026	5.55646865	0.92531942	1.68519872	5.36299719	2.62277251	2.16785543	2.55449077	3.90851581
TCGA-50-8460-01A	27.23	0	7.7285261	2.5003516	5.9802698	3.8168348	1.7491582	0.6011421	5.6100058	1.0517807	0.6043673	5.3226444	0.9508667	2.5014129	2.9388799	4.3417158
TCGA-53-7624-01A	34.26	1	6.8219116	6.0756044	2.4607219	5.8402685	0.1616918	0.3116898	7.9567371	2.6467369	3.5301078	6.2377095	5.5743504	2.0675826	3.3949921	5.0321561
TCGA-53-7626-01A	30.52	1	7.0434218	4.2462959	5.2423719	4.4605069	0.8919172	0.2040138	5.4713363	1.1383327	0.3822778	5.9078844	1.9819908	2.0392557	2.8609903	4.0235614
TCGA-53-7813-01A	13.93	0	7.910042354	3.974863864	4.85541396	4.855058938	0.169686608	0.256938545	5.190245526	1.265874572	1.390149892	5.582674243	1.87806428	2.541194453	3.353334661	5.115346421
TCGA-53-A4EZ-01A	35.18	0	8.6675136	4.0369768	4.2623738	4.8407226	1.9532864	0.3958374	7.9084676	2.0392082	2.568431	4.757956	7.1918412	2.6666416	3.1514727	5.336729
TCGA-55-1592-01A	23.03	1	7.020914	4.22848808	4.59526772	5.37369311	1.3727068	0.23985452	6.01574546	1.83447305	0.69233508	5.8905822	3.32914563	2.82011516	2.85552193	4.53386195
TCGA-55-1594-01A	38.7	0	7.40554482	4.51336378	5.00193553	5.52774866	0.3673449	0.29201133	6.83042826	2.17580338	1.82639128	6.13768072	4.68775039	2.99543748	2.97994937	5.19175757
TCGA-55-1596-01A	67.84	0	7.5720293	4.6971473	0.8843183	5.8918239	1.3192117	0.1017654	6.415464	1.8601664	1.1136117	6.0820056	3.5784822	2.6938661	3.806441	5.1288745
TCGA-55-5899-01A	30.55	0	7.4949706	4.3407451	3.1854805	5.8115461	0.1260994	0.7030707	7.9933655	2.8084427	2.982123	5.6085887	6.5995326	1.8363045	3.5719896	5.062534
TCGA-55-6543-01A	14.29	0	7.12559414	4.06617047	2.48069408	5.00298535	0.09372376	0.62818554	5.44396364	0.9487937	2.18191315	6.15388289	2.45222272	2.0080787	2.86614172	3.89678134
TCGA-55-6642-01A	80.45	0	6.80043133	4.05646071	3.63283194	4.18484242	0.54008316	0.12144299	5.14331466	1.140499	2.79661633	6.26440164	2.20353656	1.7831451	3.70835247	3.87029623
TCGA-55-6712-01A	5.62	1	6.7508468	4.3908966	4.5632747	4.7742351	0.727849	0.1850534	6.1938601	1.4175094	1.5244853	5.8532426	3.4908087	2.0320969	3.2752238	3.8149912
TCGA-55-6968-01A	42.48	1	7.3439085	4.5428225	1.919699	5.5346062	1.8621884	1.392255	7.5566711	2.2615271	2.1941332	5.7351582	5.1459365	2.1839471	3.9885479	4.9954549
TCGA-55-6970-01A	15.24	1	6.6676164	4.7952356	4.3334779	4.8731903	0.1463064	0.1968935	7.5460427	1.5684734	2.4457464	6.5598246	5.7837671	1.7021687	3.6899743	5.0821645
TCGA-55-6971-01A	45.99	0	6.8164162	4.1605752	2.8870455	4.4216849	0.1558906	1.1803425	5.8529323	1.6936262	2.5190412	6.2312031	1.9671241	2.2338096	2.3444574	4.1414764
TCGA-55-6972-01A	53.61	1	8.0280269	3.75828	0.6522739	4.9077273	0.1544455	0.5503271	8.207311	1.6728136	2.7599141	6.4872124	2.82272	2.8047466	3.2336945	4.255745
TCGA-55-6975-01A	3.88	1	7.36713517	4.76411753	1.47717595	5.42173617	0.0487822	0.06642346	6.4921458	1.54777477	3.52750818	5.66797109	5.91015488	2.10083491	3.60396731	5.23793928
TCGA-55-6978-01A	5.78	1	6.6572229	4.1065564	4.6547196	4.8095199	0.4558655	0.112634	6.1142601	2.0329144	1.5691288	6.0576706	2.4209873	1.9484165	3.2163943	4.2905439
TCGA-55-6979-01A	7.79	1	6.5984588	3.8671999	4.3823777	5.35378471	0.29598565	0.05754644	5.99429144	1.9059581	1.22332641	6.22801779	3.34758604	2.47978009	3.52934861	4.31358381
TCGA-55-6980-01A	69.28	0	7.089015149	3.275817374	5.661030459	4.867675412	0.398043722	0.078562973	6.775381643	0.773993475	0.301323756	5.278756526	2.938868251	2.439295257	3.019940205	4.106436781
TCGA-55-6981-01A	45.3	1	6.03986067	4.29219621	4.40615483	5.43527446	0.44644469	0.08093398	6.01384119	1.50326262	2.11919182	5.20438565	3.64448501	2.13388266	2.73537659	4.11415249
TCGA-55-6982-01A	32.69	1	6.5967336	3.8867008	6.6715363	5.2791966	1.7678333	0.3161189	6.5619835	1.1502333	1.7366979	5.3978005	3.1055749	2.1124901	2.9629468	4.7226835
TCGA-55-6983-01A	92.74	0	6.97634657	3.90189045	5.32735665	4.45403519	2.87919238	0.27234452	5.90022888	0.9867285	2.8691331	5.76563717	1.52946644	2.1190719	3.5412867	4.53436118
TCGA-55-6984-01A	24.97	1	5.59316954	3.87180446	2.42053107	5.02414273	0.97995869	0.12966598	6.71404896	1.48202599	3.53168194	5.36320433	3.24810807	2.01678502	2.62485001	4.20414496
TCGA-55-6985-01A	40.51	0	6.6943925	3.9789028	3.843354	5.0355125	4.1707557	0.1803652	5.5653091	1.291658	1.0184916	5.5729645	2.666959	2.2751479	2.9783086	4.2680727
TCGA-55-6986-01A	107.13	0	6.35843119	4.18951267	3.49112404	4.93961095	1.20791067	0.10545848	5.80855538	1.04319514	4.15992513	5.72325667	0.83126938	1.97821509	3.30792646	4.1683432
TCGA-55-6987-01A	70.2	0	6.9976387	3.9564669	2.9052783	4.5389141	0.1898556	0.2068387	6.5565179	1.6659131	1.5055923	5.8345583	3.4143097	2.1359291	3.5971808	4.3289435
TCGA-55-7227-01A	31.27	1	6.58931758	3.53673262	6.21106176	4.36481626	0.77788174	0.22946146	5.15550777	1.58690118	1.52361467	5.73740872	1.43774501	2.45297339	3.4792805	4.14654376
TCGA-55-7281-01A	28.65	0	7.66474335	3.25171407	5.27069108	4.84547144	0.55231297	0.12671508	5.73613222	1.05729622	0.25951756	5.03576634	2.36860508	1.98232832	2.67472773	4.56474638
TCGA-55-7283-01A	20.01	0	7.14201767	3.47121598	4.5955982	5.00409563	1.51912542	0.61256821	5.16811851	1.19141222	0.36052235	5.859563	0.8786215	2.07143624	2.64077198	4.70223884
TCGA-55-7570-01A	27.07	0	8.36141042	4.33163595	1.26241203	6.41229475	0.05223521	0.32488858	8.78162323	2.48902102	4.62048318	5.05731965	7.04785258	2.72046583	3.8076708	5.35449567
TCGA-55-7573-01A	16	0	7.54747165	4.08549042	5.65468334	4.41508466	3.90840753	0.72301848	5.97762497	1.18619197	0.96423077	5.78504026	2.46970098	3.00049499	3.29666825	4.01662522
TCGA-55-7574-01A	32.69	1	6.9574049	3.7293129	3.128372	5.2905204	0.1887334	0.1454174	5.2546023	1.7849898	0.5525762	5.7166704	2.3913371	2.4002845	2.7796129	3.9515126
TCGA-55-7576-01A	22.01	0	6.45119263	4.15866907	5.65578303	5.64424695	0.16906165	0.20057507	6.08445544	1.3103012	0.43658885	5.96333094	2.60481643	2.39228065	3.28743147	4.14388347
TCGA-55-7724-01A	23.16	0	6.9678838	4.4844259	3.3692618	4.9455213	2.9935721	0.2661066	6.1281353	1.5027124	1.0407739	6.9002252	3.6803834	1.5119495	3.2663878	4.5354747
TCGA-55-7725-01A	14.52	0	7.39074675	3.5132449	6.53000463	4.16166806	0.37602289	0.32764573	5.00886119	1.64953195	0.57146475	5.79013399	1.56616004	2.06270175	3.02497751	4.25700922
TCGA-55-7726-01A	21.42	0	6.15892235	4.39737458	2.11961546	4.84935644	0.09395122	0.07767145	5.14375033	1.84873214	1.64954626	6.41694823	3.11577701	1.97205868	3.15331636	4.17882453
TCGA-55-7727-01A	3.91	0	6.60300265	4.23853891	6.43653831	5.22534651	0.22181953	0.33655408	5.55547268	2.33232036	1.77146443	5.95285943	3.86804725	2.35144163	3.17434531	4.48421283
TCGA-55-7728-01A	23.13	0	6.9992644	3.2600343	2.2551627	4.9946676	0.1559287	0.1576601	5.8657915	1.3043495	1.9852228	5.2612655	2.1423882	2.9597964	2.2653657	4.1576635
TCGA-55-7815-01A	25.39	0	7.10499841	4.55231269	5.26492833	3.89522067	0.01809189	0.35623488	5.69504155	1.88632898	3.63037046	6.22275934	1.33498343	1.52137293	3.52666602	4.39678869
TCGA-55-7816-01A	15.37	1	6.81249198	3.32358025	5.07556637	4.40373083	7.36147161	0.26721522	5.12107035	1.037708	0.47185922	6.04180266	2.14728176	2.22444735	3.05643324	4.06810909
TCGA-55-7903-01A	18.63	0	6.7669533	3.3918783	6.7101341	5.2235444	0.2414025	0.220594	5.2547479	2.4691662	0.9175295	5.0219354	2.5284595	2.4590579	2.9359504	4.0434486
TCGA-55-7907-01A	11.27	1	6.21012693	4.39253995	4.59310083	5.03255737	1.05712021	0.5888127	5.5494926	1.1992803	0.6186879	5.56435014	2.72999121	2.31636502	2.59734998	4.22196932
TCGA-55-7910-01A	34.17	0	7.7619477	4.9307999	2.3981125	4.2022355	3.2372089	0.1667935	5.1188973	1.8102396	2.3494498	5.2472645	1.4849594	3.1080116	3.9966554	5.2123695
TCGA-55-7911-01A	17.64	0	6.4566767	3.6356922	5.2523221	5.1342164	0.0950124	0.258044	5.2125397	2.4256916	0.9448446	5.4940033	0.9696291	2.5395613	2.6301537	4.6659557
TCGA-55-7914-01A	6.14	1	7.00796045	3.71904079	6.33410084	4.7575363	0.04972845	0.45312664	4.53913714	1.02869698	1.31052557	5.78832477	0.82159841	2.07756689	3.46750481	4.40162275
TCGA-55-7994-01A	19.81	0	6.133454403	4.248412047	6.033317369	4.922842209	0.284222086	0.159496121	5.795098371	2.521419889	1.763387741	6.385570539	4.794653439	2.336639021	2.382570035	3.715614272
TCGA-55-7995-01A	29.2	0	6.28020066	4.46842075	1.48430984	5.20216174	4.87523482	0.09330381	8.85665545	1.28967591	4.45084183	5.59906064	4.68201607	3.17268971	3.11755134	4.25514114
TCGA-55-8085-01A	29.7	0	7.0328307	3.3676596	1.9254169	5.0746851	0.2598747	0.2839906	7.516957	2.1294246	3.1245093	6.1926717	4.2635599	2.4493027	4.0288407	4.4803409
TCGA-55-8087-01A	15.18	0	7.7620554	4.2601426	4.823588	4.8096718	0.2280118	0.401381	5.3678096	0.9231732	0.3668054	5.8436496	1.0650778	2.5718902	2.9321404	3.9920123
TCGA-55-8089-01A	23.06	1	6.76378826	4.40011408	3.06193146	4.82499616	0.09200374	0.06115942	7.57771364	1.75065971	4.92968994	6.10726401	4.46762493	2.16562421	3.46704328	4.30698532
TCGA-55-8090-01A	19.65	1	6.2702883	3.8139151	4.8421524	4.69093374	1.02494691	0.32652105	5.28659816	1.25426318	2.99691832	5.7652624	0.89836239	2.02669424	2.80573348	4.33415555
TCGA-55-8091-01A	19.71	0	7.034576163	4.160330536	4.271100503	4.677603005	2.511067629	0.360830576	6.389114371	1.03527673	3.70443154	5.456412732	3.962007028	2.182377555	3.27299946	4.172555292
TCGA-55-8092-01A	5.06	1	7.18929139	4.24877524	1.686003	4.75506655	0.07518508	0.15307462	6.86801851	2.07684873	1.08227575	5.32872541	1.08730558	2.90420429	3.21415813	4.45580633
TCGA-55-8094-01A	17.77	0	7.8000781	4.2656368	4.9077853	4.4672112	0.4113142	0.5767824	6.2968925	1.5765908	1.4613863	5.3888774	2.6852807	2.8473885	2.7083142	5.04474
TCGA-55-8096-01A	23.62	1	6.49129533	3.70144532	6.07473343	5.72607902	0.03918983	0.17961411	5.52760775	1.13142065	0.60467165	5.41700159	1.62472658	2.76082484	2.87790977	4.20441642
TCGA-55-8097-01A	15.64	0	7.7684467	3.6514134	6.1385578	4.0705913	0.6410294	0.3733905	5.2197285	0.9859028	0.3228133	5.7253898	1.2327321	3.3096328	2.6715964	4.042012
TCGA-55-8203-01A	17.97	0	7.15298259	3.62156358	5.45830067	4.71329205	0.02425698	0.50045287	5.63850023	1.67623397	1.7228692	5.81555321	1.28730806	2.58589472	2.86450688	5.1017632
TCGA-55-8204-01A	16.92	0	6.80736029	4.6905805	0.80215223	5.25706933	3.76593828	0.21706284	5.78313737	1.53714321	2.50923337	6.15643874	4.07527701	1.84568136	3.72099438	4.43902893
TCGA-55-8205-01A	19.68	0	6.8241037	4.8418912	5.6386759	4.9339914	0.1741324	0.1397153	6.3979225	2.3460182	0.7995696	6.6716196	1.4364077	2.2657791	3.6051108	4.5990258
TCGA-55-8206-01A	29.17	0	7.9780254	4.1921726	4.5172421	4.4021967	0.7620209	0.8149889	6.241315	1.2550352	1.0868941	5.987407	2.1495854	2.7345663	2.5092567	3.9979357
TCGA-55-8207-01A	32.1	0	7.4601738	3.7273519	6.4397162	4.624373	1.7799478	0.2407149	5.0144033	0.9440215	0.4313797	5.2216675	1.4598587	2.297793	2.3628475	4.1239326
TCGA-55-8208-01A	22.14	0	6.747994	4.1029037	4.2601557	5.0925017	1.0998653	0.0751241	7.0141176	1.4339538	3.8349407	5.9677505	4.798676	2.5032618	3.2075916	4.4254862
TCGA-55-8299-01A	15.41	1	6.6521289	4.5169967	3.8963052	4.730329	0.0320897	0.1091311	5.6268303	1.8221016	1.4301716	5.6642705	2.2568003	2.1909669	3.442973	4.6335195
TCGA-55-8301-01A	17.54	0	7.35195273	3.3362524	4.81527128	4.90541057	0.06492029	0.19141454	5.88007964	1.86915865	0.8250569	5.53937081	2.49861281	2.79684187	3.74274663	4.42957149
TCGA-55-8302-01A	15.7	0	6.4914024	4.024925	4.9154659	5.5092438	0.3303596	0.2180734	7.268174	1.6041974	3.2953021	5.3087206	5.9720075	2.4031209	3.0916493	4.2634385
TCGA-55-8505-01A	14.45	0	6.84522658	4.60863609	2.3884519	5.35769918	0.08808979	0.11650274	8.77126929	1.85427956	4.69836163	5.27912999	5.99795767	2.20494389	2.85514142	5.4356156
TCGA-55-8506-01A	0.36	0	6.16247457	4.08773339	5.76549661	5.44625157	0.09693036	0.23600661	5.60334719	0.87047182	0.57319422	5.54097198	1.36612186	3.148766	2.82775324	3.90007997
TCGA-55-8507-01A	13.73	0	7.24933958	3.90575953	5.16676189	5.05103388	0.23883666	0.46709946	5.03653463	1.15596054	1.02516946	5.33949349	1.94311672	2.49966576	2.70568264	4.88245325
TCGA-55-8508-01A	20.27	0	6.69251988	3.72402291	3.19494863	4.56310744	0.75238847	0.39009261	5.31994435	1.17405692	1.04421346	5.17805861	2.49646576	2.85255016	2.71256258	4.13446279
TCGA-55-8510-01A	17.71	0	6.5251985	3.2445789	4.6701307	5.0366403	0.798592	0.3425066	6.4449073	1.5675661	2.166923	5.442387	4.7336523	3.8411513	2.8085379	4.0147544
TCGA-55-8511-01A	18.13	0	6.50607182	4.15705368	4.42301913	5.29356574	1.9836405	0.07213556	6.08655501	2.09928468	3.44411946	5.77012859	3.31968783	2.9027453	3.0962946	4.00210805
TCGA-55-8512-01A	19.94	1	7.220106794	4.439319955	2.380771972	4.454785795	6.515118735	0.335278283	6.017436035	0.923527201	3.154887822	5.711304436	4.546341666	3.063715681	2.946763283	3.770215605
TCGA-55-8513-01A	25.99	0	6.790573	3.8498723	3.8437993	4.553177	4.6085185	0.2262998	5.5854309	1.0195558	1.8839828	6.0351987	2.5301281	2.4322676	2.7282328	3.718712
TCGA-55-8514-01A	17.08	0	6.60946891	3.48816815	6.05165497	5.51879776	0.07054171	0.38840191	5.12169729	0.57399897	0.5831765	5.45289868	2.37452859	3.38229531	2.4271706	4.44862264
TCGA-55-8614-01A	17.61	0	6.3769138	3.8621013	2.4367929	5.5015893	2.2435739	0.2281881	5.6268631	1.6118844	0.4519271	5.1087821	4.5986939	2.8440675	2.7575253	4.0302815
TCGA-55-8615-01A	14.65	0	6.89587205	3.89409688	4.7036976	4.65166111	1.4695123	0.63603679	5.4484356	1.14930763	2.12761535	5.36557811	2.92109914	2.64568375	3.21825994	4.75922613
TCGA-55-8616-01A	1.58	0	7.49868126	3.36484499	5.25695866	5.23078329	3.87333226	0.54402819	5.76750983	1.04488044	0.33784332	5.42597153	2.79859865	2.54460254	2.82119054	4.08407832
TCGA-55-8619-01A	13.67	0	6.68727317	3.09231747	3.42732455	4.73750916	1.48560074	0.08428113	5.8020974	1.11477494	0.62759758	5.80601631	2.26398902	2.31166371	2.64166132	3.78366479
TCGA-55-8620-01A	12.32	1	7.0027322	4.4084219	0.7838328	6.2180434	0.4431493	0.5998285	7.4562811	2.2918875	3.0274635	5.0508946	4.573736	2.7735116	3.6798964	5.2043867
TCGA-55-8621-01A	16.92	0	7.1206485	3.5788702	3.9086831	4.6027192	4.1541955	0.3093548	5.9383751	1.2053303	0.8534046	5.9238295	2.4997045	2.4209911	2.6663185	4.1829204
TCGA-55-A48X-01A	22.63	0	6.63458565	4.23368212	5.23148768	5.12719533	2.96955482	0.22373549	5.82921541	1.58838612	0.38183184	5.30378967	3.02222872	2.91020535	2.53710149	3.97310724
TCGA-55-A48Y-01A	20.7	0	7.19441486	4.17254241	1.22914088	5.06655168	0	0.04725627	7.9061014	1.70741146	3.07581187	6.2061509	3.49926733	2.12040517	3.11129877	4.41530352
TCGA-55-A48Z-01A	21.39	0	6.5556271	3.4448897	5.5891444	4.9964976	0.1269689	0.1827461	5.3810028	1.9454024	0.6723873	4.8489637	2.7881199	3.689036	3.223151	3.9812594
TCGA-55-A490-01A	3.25	1	5.52485716	3.47740942	5.26087962	4.76744572	0.02778961	0.26604753	5.70672246	0.99877892	0.12936163	5.14691608	1.03439609	2.49582558	3.55579876	3.66542699
TCGA-55-A491-01A	20.57	0	7.0570731	3.1372961	4.2260137	5.8763125	1.9812038	0.1547752	5.6911718	1.2942868	1.9225444	5.5621346	1.5582664	2.4068142	3.5003526	4.856052
TCGA-55-A492-01A	19.58	0	7.931716	4.403687	2.217921	5.4163305	0.1643157	0.1938201	7.6184642	0.6449282	3.4136075	4.907059	4.2012458	3.1735248	3.0192573	4.6648145
TCGA-55-A493-01A	0.92	0	5.50941249	4.22103579	4.56797304	5.518688	0.05492589	0.08922487	5.48044601	2.06247471	1.23626074	4.66253908	3.49745983	3.3363806	2.64155063	4.55993782
TCGA-55-A494-01A	15.8	0	6.8640556	4.07240367	6.03252868	5.00671794	0.15046103	0.29973764	4.17130105	1.6570548	1.51058092	5.21284193	1.45756607	2.87298234	2.49624841	4.45597182
TCGA-55-A4DF-01A	20.17	1	6.722895034	4.682421875	1.672155424	5.488957472	5.739316597	0.264209558	7.926585996	2.257879074	2.18717847	5.576794193	4.789211386	3.107781137	3.455129442	4.292662539
TCGA-55-A4DG-01A	19.97	0	6.9346777	3.2695917	6.0255476	5.3801614	0.5016207	0.4241696	5.1841165	1.6709197	0.2269199	5.2834186	3.8061549	2.9738743	2.4923146	3.9027592
TCGA-55-A57B-01A	17.94	0	5.7435843	3.501189	5.7282983	5.1443377	0.5210683	0.4195444	6.0685685	1.4297531	2.3476985	5.2615106	1.6807042	2.8042163	2.7888977	4.0007873
TCGA-62-8394-01A	4.57	1	7.0122057	3.3917432	4.5929448	5.5141816	0.3274918	0.0951839	5.5417378	1.8749576	0.7749483	4.9433346	3.1299584	2.6695451	3.0247788	4.2187947
TCGA-62-8395-01A	39.95	0	7.6094854	4.7940984	4.2666127	4.9176581	0.7581473	0.3697245	6.8510411	1.0540034	2.2223808	6.0463418	1.9096724	2.8039905	3.0432981	4.1990662
TCGA-62-8397-01A	42.35	0	8.1486355	2.74610319	5.27691334	4.01179651	0.10867603	0.25452286	5.97669453	0.74869431	0.14395198	6.00776936	1.26136746	2.82356095	2.90457173	4.0533104
TCGA-62-8398-01A	14.59	1	7.6341952	4.86360461	2.64889444	5.12427602	0.02883626	0.1798496	8.30126264	2.02716908	4.63506717	5.46495325	3.64485161	2.10564358	3.27911846	4.98050686
TCGA-62-8399-01A	88.57	0	6.8898583	3.3910221	3.999466	5.6247847	0.349265	0.3512984	6.7507441	2.1750078	0.3157257	5.8453128	2.071767	2.4442046	2.5199116	3.7233977
TCGA-62-8402-01A	49.21	1	7.0906333	5.2464289	5.6565387	5.9699065	0.4573932	0.3413145	5.9225666	2.0857027	3.1165375	5.3352469	1.7658889	2.2437329	2.8376807	4.9845062
TCGA-62-A46O-01A	47.77	1	7.1514129	5.7529968	1.7396206	5.3051628	0.3667194	0.2483188	7.3264762	2.4786275	3.5302042	5.635511	4.3078895	2.5202947	4.1350383	4.7718628
TCGA-62-A46P-01A	19.51	1	7.3649175	4.2823929	2.1068247	4.268996	0.2466765	0.1668782	5.4986961	0.9863285	2.5106833	4.6939079	1.2846907	3.0799189	3.6202886	4.420162
TCGA-62-A46R-01A	56.67	1	6.5741098	3.8849027	7.8624565	5.6069147	1.1657236	0.2967965	6.045266	1.9847469	0.194906	5.2830501	2.8823216	2.9586004	3.3753867	4.6534149
TCGA-62-A46S-01A	54.3	1	7.25048576	5.82953945	3.73290897	3.83170693	0.08782273	0.2017502	5.48362802	1.2034514	2.00526823	6.17918181	1.89426654	3.39879071	3.06043443	4.10386487
TCGA-62-A46V-01A	72.24	0	7.9042695	2.6131506	6.3220943	5.140579	1.1971329	0.5383856	4.8251097	1.8976582	0.848192	5.9907849	0.6266788	3.510457	3.0948815	4.3127715
TCGA-62-A46Y-01A	13.6	1	6.7983757	3.4610435	6.3599582	5.206062	3.399439	0.2001623	5.6928896	1.6616178	0.542108	5.6131643	2.7136087	2.8684359	3.2011841	4.3715587
TCGA-62-A470-01A	39.22	1	7.4014962	4.340426	4.7735778	5.0601539	0.8287861	0.0747391	7.532461	1.9842515	3.7866998	5.6585544	5.408614	2.8945638	4.1286443	4.6633378
TCGA-62-A471-01A	40.93	0	7.221376544	4.265223774	1.048781977	5.658434174	0.018863191	0.126916427	9.096289608	2.122809149	5.218562369	4.470512389	6.635626203	2.453532401	3.79998261	5.85370967
TCGA-62-A472-01A	29.89	0	7.0954264	3.7673717	6.3747667	5.0171661	1.4821028	0.6667758	4.998607	2.7449762	0.9927334	5.6948705	1.524436	2.6789949	3.5524939	4.5656765
TCGA-64-1676-01A	56.77	0	6.69672237	3.11712844	5.48318856	5.53769344	0.12816321	0.05406155	4.59845387	0.970396	0.28520559	4.76199579	2.49642148	2.85946925	3.45078479	5.36749643
TCGA-64-1677-01A	20.63	1	7.5124431	3.6616033	3.311208	5.7744231	0.1402754	0.1844766	5.5405541	2.0397456	1.2500587	5.2666207	4.5535048	2.5764585	3.257354	4.993261
TCGA-64-1678-01A	39.06	0	7.5020303	3.1161916	2.4660187	3.534379	0.803156	0.1336659	7.2787419	1.6289065	2.6165922	5.6766203	3.5750552	2.2915295	3.4876763	6.0128955
TCGA-64-1679-01A	81.73	0	6.06534116	4.04517983	4.1959268	4.62916929	0.04642511	0.14734561	5.15534394	0.984644	0.13079771	5.69456526	3.11750802	2.13095757	3.04468146	3.96263693
TCGA-64-1680-01A	36.99	0	6.8948115	3.3970037	5.0054358	4.0916214	2.1890298	0.6088761	5.4396694	0.9518096	0.6126073	5.6730352	2.6178646	2.3797411	3.6317379	5.080261
TCGA-64-1681-01A	38.34	1	7.9776984	3.8299949	5.6449992	5.0093636	3.9477156	0.3617704	6.7034034	1.1494663	0.7004789	5.1999148	2.3522871	2.395225	2.9383292	4.0736478
TCGA-64-5774-01A	87.91	0	7.1602277	4.0847285	2.7892109	4.9950669	0.1326266	0.3718253	5.3865465	1.5333741	3.2790059	5.3827443	2.1599565	2.6389034	3.2868698	4.9514673
TCGA-64-5775-01A	2.04	1	6.699258943	4.047523163	2.880488996	4.582826165	0.008931402	0	5.493980852	2.004542685	1.292016838	5.789087051	0.767127607	1.194923431	3.669856425	4.178013416
TCGA-64-5778-01A	42.87	0	7.30700256	3.343521	5.1848216	5.50231657	0.97823216	0.07162282	5.32324703	2.05999168	0.16842623	5.02018579	3.42201736	3.40720446	3.09721002	5.16369811
TCGA-64-5779-01A	28.38	0	7.2495796	3.8590674	6.4322209	3.7328704	0.9453508	0.5592044	5.2588417	1.6884706	1.470611	5.0603422	3.0619895	2.1568965	2.7699349	4.526976
TCGA-64-5781-01A	51.22	0	7.13507221	3.84597554	1.15339037	4.87658234	0.01203908	0.06793961	7.4975918	1.05136289	3.37670598	5.12236152	3.65318845	2.60741582	4.00235687	5.37029592
TCGA-64-5815-01A	28.45	0	6.51284793	3.60746999	4.60410059	4.719136	0.08091746	0.31616705	4.8930217	0.93080339	0.64773285	5.76061678	1.22295863	1.76068289	2.67711653	4.23032817
TCGA-67-3770-01A	20.04	0	7.6826762	3.4042476	5.5325489	5.1402823	0.4677293	1.1361303	6.176523	0.8371945	1.3358053	5.9585514	1.4727707	2.7029957	3.6461898	5.2823364
TCGA-67-3771-01A	20.04	0	6.1259547	5.8315563	1.0785646	4.7503438	1.0270322	0.469144	8.0779227	1.5451858	4.5771884	6.3801373	5.900764	2.0395041	3.5682038	5.3945457
TCGA-67-3772-01A	18.82	0	7.1434126	3.9535813	5.2768825	4.9824959	1.1566573	0.398516	6.7271877	0.4687209	0.7267051	6.0661617	2.2822514	1.3940123	4.1275356	5.0926453
TCGA-67-3773-01A	14.03	0	7.56598435	3.12120358	7.40880403	3.4342904	0.06964081	0.324294	4.76552301	1.30970328	0.41697077	6.21877363	1.11216183	2.91321806	3.40019415	4.75895653
TCGA-67-3774-01A	12.65	0	7.0335799	4.0527925	3.1260346	4.3262903	2.0446458	0.4641476	6.2700798	1.3008346	1.9989012	6.3079539	3.0562579	2.7810853	3.3205288	4.4632594
TCGA-67-6215-01A	5.72	0	6.63165717	3.79593511	6.72504046	4.34569274	0.06704688	0.53125095	5.89401918	1.57979962	0.49903201	5.6229036	0.89037603	2.68652424	2.94260756	4.3004391
TCGA-67-6216-01A	4.63	0	7.042181943	3.048642432	6.194907718	4.933372499	0.151294874	0.165022554	5.388072791	1.526460344	1.353702733	5.671486897	2.340486735	2.774182333	3.472443431	4.41093076
TCGA-67-6217-01A	13.86	0	7.39357989	4.00028301	5.85020017	5.10881423	1.58181141	0.29724425	6.26223706	1.03875697	0.62194097	5.49366238	1.86929416	2.9443804	2.92193821	3.85328197
TCGA-69-7760-01A	6.64	0	6.92453706	3.37045285	4.95440911	4.76211795	0.04965714	0.11183508	6.19293674	1.56314032	1.64307532	5.32579867	1.57141001	2.49534647	3.57469499	4.17651805
TCGA-69-7761-01A	6.11	0	6.23345542	4.44536998	3.01634822	4.73341848	0.1190243	0.05011448	5.63279245	2.07042697	1.83072237	6.35381073	3.15025484	2.07041884	2.87327324	4.20927752
TCGA-69-7763-01A	22.67	0	7.06909533	4.47655626	2.67581908	4.08288066	1.0865249	0.10899853	5.83817308	1.02953291	1.45781873	6.13008712	2.18041533	2.24751365	2.94696148	4.28609387
TCGA-69-7764-01A	13.6	0	7.539203	4.9012207	5.6236375	4.6956372	0.1212072	0.316095	5.8545457	1.4473647	0.7699891	5.5648304	1.6129413	3.2190577	2.2851558	4.2722446
TCGA-69-7765-01A	5.42	0	6.70089119	3.90364348	5.78012224	4.33919067	0.06565444	0.22925421	5.0388792	1.19901718	0.67044156	5.57700171	2.78182925	1.88816199	3.05220913	4.03398324
TCGA-69-7973-01A	7.56	0	7.25942741	4.07398467	4.55190083	4.58730153	0.04296072	0.8390514	5.46913066	1.85615986	3.78531865	5.99965068	1.11172709	2.13012858	3.13402314	4.49232036
TCGA-69-7974-01A	6.04	0	6.3309172	4.4617855	6.5157927	4.8797707	2.5012424	0.4308981	5.67229	1.6930212	1.1345733	5.8552788	2.3456131	1.9234048	2.5500243	4.0830698
TCGA-69-7978-01A	4.4	0	6.31040605	4.55262739	5.42854377	4.76466454	0.34607218	0.09647687	5.5908127	1.16600654	3.04382338	5.88058503	4.92231442	2.08325143	3.20908122	3.96920164
TCGA-69-7979-01A	13.4	0	7.3386488	3.6753144	1.3258925	5.4303108	1.3578347	0.1852931	7.507479	1.4066091	2.2243836	5.0975439	5.1300557	3.0270786	2.1876611	5.2108885
TCGA-69-7980-01A	13.5	0	7.03866699	3.82513475	3.40936269	5.00745489	0.5163596	0.18472065	6.01181293	1.39263257	1.10054912	5.21836427	3.34801632	2.99473477	2.3567585	4.43242182
TCGA-69-8253-01A	13.99	0	6.64480515	4.71386911	3.99547471	4.24686188	0.50792015	0.02820401	7.54684352	0.65600384	3.9916885	5.2062537	4.02078345	2.52353144	2.52253002	4.60414748
TCGA-69-8254-01A	13.44	0	6.508126	3.96265536	4.72616084	4.76822268	3.69053692	0.54203782	5.05609559	1.26072496	2.93328741	5.4742911	2.34542464	2.38460563	2.29271203	4.3444738
TCGA-69-8255-01A	4.24	0	7.866038	4.0588978	1.5974541	5.9544513	0.2115023	0.2550965	6.7480254	2.4188023	1.377098	4.7559389	4.3544442	2.7780948	3.0304819	5.715293
TCGA-69-8453-01A	26.71	0	7.27844192	3.74961714	3.40301711	4.54230942	3.10485851	0.17435172	6.15744097	1.48656718	1.93724017	5.96412138	2.43678827	2.19024255	2.51941394	4.36071196
TCGA-69-A59K-01A	19.42	0	5.8602302	3.5579479	3.9278185	5.0830095	2.6042316	0.3268858	7.335953	1.7930823	2.9836799	5.0779879	5.1225045	4.308044	2.2370363	4.4088715
TCGA-71-6725-01A	8.41	0	6.4132837	3.5410103	3.7419005	5.3576405	0.0939719	0.2922613	6.0089634	0.8514342	0.9912274	6.0844556	1.4502559	2.8624785	3.680442	3.6250318
TCGA-71-8520-01A	6.9	1	6.44920444	4.18753232	6.40322362	5.16692754	0.10883493	0.46394805	5.62793879	1.5808974	1.09759648	4.85335512	1.21642945	2.67432702	2.9777314	4.2525957
TCGA-73-4658-01A	52.56	1	6.45628049	3.39748107	6.32447685	4.78536622	0.22061453	0.12777387	5.43213815	0.69278892	0.32706969	6.09358138	1.9612478	2.21610908	3.27099176	4.27582681
TCGA-73-4659-01A	23.36	1	7.2306069	4.0768278	3.3816418	4.5648876	0.2553161	0.2074664	7.1019154	1.2922504	3.4673176	6.1798782	2.9769695	2.0185961	3.5542154	4.6139901
TCGA-73-4662-01A	82.62	0	7.57593175	4.13880972	6.51445643	4.88647798	0.53289703	0.40699325	5.62906763	1.44678078	0.43514659	5.66568609	1.11060009	2.55615578	2.71204927	4.45409511
TCGA-73-4666-01A	26.28	0	6.49717088	3.88066307	5.07903897	5.94624939	0.07046128	0.0252177	7.15801768	2.00509205	4.14791126	6.15089658	3.59659171	2.32376871	2.9718265	4.28797661
TCGA-73-4668-01A	15.34	0	6.62357629	3.90152865	4.87995111	4.68132441	0.01830661	0.33320299	6.14944639	0.87196838	0.40298861	5.38734791	4.37195685	2.60813807	2.57256665	4.19348017
TCGA-73-4670-01A	4.3	0	6.48821682	4.27578127	1.28499478	5.37321458	0.25397596	0.03635711	8.67605994	1.63591726	2.22633723	6.22914052	4.59369982	1.60108429	3.84854384	5.71010715
TCGA-73-4675-01A	30.29	1	7.156137817	3.862866348	1.305936448	4.901273756	1.846265501	1.013670783	8.133915149	0.936823962	5.673480835	5.347942416	3.125882166	2.661380085	3.731144257	4.762675828
TCGA-73-4676-01A	9.23	1	6.43395404	4.69907691	6.79822819	5.0188878	0.34635282	0.06454331	7.22642635	1.42329567	3.60584969	5.62202862	6.80104273	2.51082271	3.29330221	4.63279679
TCGA-73-4677-01A	1.25	1	7.3326416	4.9388578	2.6735097	4.643193	1.3262868	0.1614589	7.1280123	0.6672343	3.7442277	6.3745936	5.283837	2.0296128	2.888783	4.2270082
TCGA-73-7498-01A	39.06	0	7.42388121	4.52075938	4.12145769	4.89951928	0.45793734	0.53746556	7.00084992	0.82832392	1.26236463	5.72930426	3.43716712	2.61699614	2.33894481	4.03962447
TCGA-73-7499-01A	50.3	1	7.4868525	2.9575326	3.2708805	5.9943761	2.3568875	0.2112835	6.4072347	1.8625448	0.8881296	5.4940493	3.1957335	3.0393674	3.8729759	4.6829848
TCGA-73-A9RS-01A	11.17	1	7.5090583	5.03471008	0.50463897	5.50622522	0.08975508	0.11692957	6.81384268	2.36804806	3.12142564	4.62945844	2.29843317	3.5736338	3.61381948	5.9625669
TCGA-75-5125-01A	66.59	1	7.4654549	3.7598226	5.9226881	5.1985217	0.2656937	0.2445146	5.6857205	2.8909542	0.6970254	5.7274207	6.3851193	2.950305	3.1211531	4.2926194
TCGA-75-5146-01A	77.79	0	8.10473437	4.50323708	4.4811342	4.87003438	1.59272445	0.30156318	5.53667044	0.77853874	1.31471681	6.56106604	2.51296699	2.37787333	4.0262384	5.21699217
TCGA-75-5147-01A	43.79	0	7.1691516	3.4611848	4.7679685	5.2730701	1.6774481	0.6995829	5.5672514	1.6533409	0.9274151	5.8067829	3.3639398	2.9336037	3.6977573	5.0813903
TCGA-75-6206-01A	85.09	0	7.73253532	4.76850552	4.35527235	4.52277213	0.09853943	0.40009412	7.0428548	1.16721464	1.75811189	6.09571572	3.33199241	2.37347023	2.66633919	4.2291338
TCGA-75-6212-01A	49.8	1	7.952235	3.46687904	6.64742757	4.24366679	0.79548918	0.42703663	5.36253501	1.03957233	0.76277357	5.77324137	3.67410536	2.53809695	2.84621007	4.40359136
TCGA-75-6214-01A	36.63	1	6.202537	4.605159	2.41022	5.2715472	1.2349565	0.2328993	6.5862465	1.882056	1.446701	5.9886179	3.3742443	2.0926197	3.7512614	4.8652125
TCGA-75-7025-01A	108.57	0	7.43594153	3.01520452	5.30530896	4.96815204	4.23703002	0.36945602	5.94286618	1.02490799	0.30128482	5.25055791	2.25923234	3.4436766	3.10679366	3.719372
TCGA-75-7027-01A	100.49	0	8.0263296	4.8204804	2.3088418	4.6627911	0.1223556	0.1415292	7.3890778	1.7990404	5.2486727	5.2840301	4.4344166	2.0419309	3.0398054	5.9143275
TCGA-78-7143-01A	162.98	1	6.5521151	3.6014084	4.8057653	5.2231818	0.3474195	0.4768382	5.6009324	2.4369905	2.5747574	5.5164461	4.8347273	2.9509641	3.45915	4.118032
TCGA-78-7145-01A	27.14	1	6.91620312	3.95323109	5.57826472	4.89660538	0.32713556	0.08149928	6.69423307	1.67175364	0.5695596	5.57463326	2.90483819	2.13556338	3.55440973	4.3245589
TCGA-78-7146-01A	5.68	1	6.13161568	4.69962879	4.89948968	5.42547452	0.0579636	0.04781634	7.27229342	1.64160789	4.04202824	6.29934575	7.32585807	2.15853408	4.29708245	4.35487885
TCGA-78-7147-01A	19.25	1	7.7509739	3.7248448	3.5678953	5.1398015	1.6050659	0.4518002	6.6222803	1.3615455	1.3051828	4.8555837	4.0659135	2.7066692	3.1499326	4.4783314
TCGA-78-7148-01A	20.57	1	6.807220411	5.233608314	3.118651036	4.761902329	0.009041277	0.258668849	7.669007605	1.456576496	4.258041362	5.706373673	3.501352247	1.95226409	2.92863322	5.068546634
TCGA-78-7149-01A	129.43	0	7.83048574	4.12950297	1.3662352	5.23736093	1.39253287	0.27064752	7.76422855	0.7665505	2.97888668	5.19571036	4.81106166	3.24454897	3.20202011	4.31000333
TCGA-78-7150-01A	21.88	1	6.00493704	4.71963959	2.25726364	4.89387924	0.01814809	0.12227409	8.09349974	1.49343049	3.81890365	5.81728604	6.20714006	2.02098889	3.71769314	5.8608092
TCGA-78-7152-01A	39.91	1	6.9628933	4.3735246	2.3634916	5.0245136	0.13489	0.3919794	6.2727576	1.1917126	2.98672	5.9300939	1.0248946	2.5411748	3.1721047	4.3487444
TCGA-78-7153-01A	119.42	0	8.14445713	3.86859672	5.62645366	4.59268009	0.55952804	0.62579006	5.54505889	0.84568323	1.42812768	6.05177629	0.59451874	2.28989686	3.78582663	4.32503715
TCGA-78-7154-01A	19.48	1	6.8968267	5.6020858	4.5810174	5.7651202	2.1117482	0.3658381	8.614081	2.3060099	4.7781055	5.4540721	5.1996653	1.8730482	3.2521489	5.1344195
TCGA-78-7155-01A	38.47	1	7.1821454	3.8196954	0.7856068	5.5598741	1.2338007	1.2225021	7.7518637	2.9746746	0.1984568	5.6910927	4.0060027	2.6689036	3.1181061	4.3094155
TCGA-78-7156-01A	32.06	1	8.12465865	4.99764107	3.70253389	4.39729288	0.05392207	0.42691758	7.80381836	0.7962061	4.06352028	5.79635238	3.47535137	2.57069374	2.65321537	4.46978535
TCGA-78-7158-01A	5.88	1	7.68627368	3.2303939	5.75446768	4.6713054	0.26248246	0.92257925	5.49800643	1.61133017	1.38627975	6.25299296	0.69633709	2.35391653	3.53071555	4.08672413
TCGA-78-7159-01A	64.85	0	7.0505078	4.8760724	3.1295746	4.4522052	1.7088876	0.2101859	5.5217874	1.7203429	3.6601578	5.7446158	3.2552667	2.5437818	3.3106955	4.3833442
TCGA-78-7160-01A	22.9	1	6.59649598	5.72554927	3.36745061	4.22253621	0.39859049	0.16896588	7.09143495	1.34218906	5.23712653	6.45753778	4.97513165	1.9726161	3.30195733	4.41510405
TCGA-78-7161-01A	9.56	1	6.9187782	4.1748984	3.1715487	4.0274351	0.986342	0.2201952	4.4329018	0.9420935	2.5203179	5.3312161	1.6514945	2.7142928	2.8393086	3.9010685
TCGA-78-7162-01A	104.11	1	7.2958169	5.0011355	4.0683161	4.5855986	2.1269952	0.4635667	7.8945638	0.9232444	2.9668657	6.0839147	4.9718914	2.0433028	2.8488638	4.3470916
TCGA-78-7163-01A	238.11	0	7.55890908	4.07284989	1.93127795	5.78697685	0.09193691	0.26875354	6.60757014	0.92266499	2.59518351	5.82187401	1.33985567	3.41934814	3.33705307	4.83145868
TCGA-78-7166-01A	8.48	1	6.91063652	4.72135049	1.04204114	5.13526739	0.12861704	0.020911	8.48671773	1.61024945	3.07385149	4.32418315	5.39018089	2.71447849	2.53301278	4.52109877
TCGA-78-7167-01A	88.07	1	7.6298397	4.5428609	3.4264264	4.1545395	1.5871226	0.4383338	7.4104004	0.8971837	2.8190393	6.0338841	4.3805643	2.1545594	2.5681514	4.480829
TCGA-78-7220-01A	26.51	1	8.0455769	5.3120946	3.5038957	5.0806289	0.1429609	0.1536607	7.7176747	2.8554929	3.2945361	5.9956549	7.6826521	1.8181894	3.7038988	6.432991
TCGA-78-7535-01A	31.18	1	6.059298131	3.24371719	3.733748516	5.653668444	0.005827645	0.106382961	6.247898628	0.886420687	0.356130263	4.136266726	1.265051565	3.70916904	2.887428329	3.568750646
TCGA-78-7536-01A	8.02	1	7.17088551	4.85679431	1.1713518	5.66726672	3.96679541	0.43222182	5.75023236	1.99200489	1.15638681	6.28266203	3.89962556	2.82668285	3.59832554	5.18872697
TCGA-78-7537-01A	53.29	1	7.2980521	4.2860236	1.0571009	3.767564	0.1267478	0.1141651	6.0885715	0.7787845	2.7310148	5.1406182	0.6060997	2.728857	3.1420671	4.0683354
TCGA-78-7539-01A	25.99	0	7.93324884	3.42750864	6.62305972	4.9632792	0.04083587	0.28985162	6.72965048	0.88611911	0.26447876	5.4653378	1.05695076	2.62235806	2.67359699	4.59880808
TCGA-78-7540-01A	39.32	1	6.35700207	4.3947881	3.06114007	4.81656455	1.39522192	0.07820336	5.452277	0.90903485	3.55294411	5.24247915	2.30662735	2.05294962	2.21494543	3.9220881
TCGA-78-7542-01A	10.55	1	6.79553464	4.67219433	1.91414353	5.41083138	0.95196548	0.05650819	5.97726988	2.06883863	2.22713964	4.9694921	2.58005822	2.64377754	3.02726948	3.8661073
TCGA-78-7633-01A	50.2	1	7.32463331	5.31884481	6.46345588	4.70063825	0.02489205	0.75419875	7.32399669	1.01612664	2.51500505	5.56141073	4.76463888	1.87879272	2.36956779	4.57215981
TCGA-78-8640-01A	232	0	6.44751737	4.29098697	1.764202	5.49260069	0.05656765	0.16135568	7.54702385	2.227023	4.08206669	5.0561468	5.40536493	2.92157643	3.04965107	5.06938823
TCGA-78-8648-01A	39.72	1	6.88280325	3.4037529	3.51787371	4.53614581	0.05343043	0.14867501	5.89323853	1.09899463	0.7129567	5.66482607	2.31938276	2.15401895	2.87767275	3.9058469
TCGA-78-8655-01A	77.53	0	6.79491679	3.55733999	3.23396952	4.47333707	0.10022031	0.24463606	4.95325271	1.28873853	1.03147309	5.54093968	1.49161357	2.57059086	2.03808305	4.40803914
TCGA-78-8660-01A	10.55	1	7.0308698	3.4984009	5.1375874	5.9466304	0.3696356	0.3322831	6.9597319	1.6630904	2.5415986	5.1851369	6.5398059	2.8648639	2.9657389	4.7460613
TCGA-78-8662-01A	110.41	1	7.0686606	3.5423154	0.7976648	5.4362227	0.579	0.5065891	6.4175992	1.7687772	0.8493532	5.3406971	3.389526	3.0161677	2.7072095	5.3247282
TCGA-80-5608-01A	93.04	0	7.14877513	5.01344583	4.71729046	4.40678863	1.25334908	0.1732362	5.55388203	1.18045711	2.55501215	5.3979239	1.49788802	2.64601814	2.79561537	4.76174203
TCGA-80-5611-01A	85.25	0	6.9755471	4.0313282	1.1201024	5.5840834	0.2759685	0.1973978	6.8376341	1.7293903	3.5979431	4.9894136	4.8298319	2.7315997	3.0486196	4.8683933
TCGA-83-5908-01A	27.07	0	6.4363177	4.2912121	4.8339566	5.4750594	0.7855266	0.1345314	5.4522535	2.402401	2.1044776	5.3294774	2.7003597	2.5526945	2.7045671	4.2654848
TCGA-86-6562-01A	12.35	1	6.40230457	4.06803509	3.12958792	5.16501148	0.11793935	0.24440759	5.78580341	1.21895393	0.98037218	5.98880298	2.78190847	2.01940047	2.90958204	3.99365985
TCGA-86-6851-01A	5.88	0	7.3820076	3.4085039	5.6171688	4.7569081	0.1401008	0.2401024	5.4278152	1.552158	0.8993755	5.4173785	2.4440257	2.65321	2.8228074	4.1732838
TCGA-86-7701-01A	31.11	0	6.9015787	4.5385079	4.6669932	4.2762693	1.3260503	0.2077236	5.0480175	1.7079262	2.9070163	5.87259	2.7592938	2.2779016	3.5596804	4.4147266
TCGA-86-7711-01A	34.36	1	6.43254106	4.41181917	1.74767208	5.36897756	0.02227654	0.01377449	7.62468863	1.5485156	4.25205349	5.78920262	7.48024684	2.24500995	4.17595071	4.43293392
TCGA-86-7713-01A	38.01	0	7.3581751	5.6654766	3.3513159	4.5360826	0.1215984	0.3288611	6.3454675	1.9368276	1.7814236	6.207044	1.6371374	2.9751577	3.0316044	4.1863545
TCGA-86-7714-01A	20.53	1	6.7215175	3.6877435	5.7260118	4.672104	0.1040118	0.2931668	5.6628492	1.3727236	1.52049	6.2050466	3.6230563	2.1057534	3.3656827	3.9750418
TCGA-86-7953-01A	32.75	0	7.36292739	5.75090503	1.46175403	4.43261069	0.46741492	0.11523545	6.69158552	1.74485269	3.01372421	5.84943923	1.66553673	2.63450594	4.08773764	4.66647969
TCGA-86-7954-01A	19.88	0	7.3717047	3.3185879	5.1352707	5.1523505	0.7304596	0.1782974	6.5619246	1.3175172	0.9808216	5.9390063	3.3541641	2.7351966	2.8151302	4.5488492
TCGA-86-7955-01A	35.22	0	7.22197771	5.12073171	0.69067593	6.30699646	0.05331769	0.34670575	6.24490987	2.36898688	2.35919699	4.59134436	3.3776381	3.00021851	3.37365537	4.6838502
TCGA-86-8054-01A	37.71	0	7.0793625	4.229775	5.2185195	4.6882524	1.0520709	0.5159238	5.3439258	2.3095229	3.3639119	5.9783739	2.2211975	2.0174952	3.6977669	5.0704193
TCGA-86-8055-01A	4.07	1	6.0723569	4.2733912	4.2104065	4.8662882	0.3042544	0.2802899	6.0287692	1.4606807	1.6340091	5.3858166	3.6460658	1.9755465	2.8134759	4.1704648
TCGA-86-8056-01A	4.57	0	6.92789135	4.04769367	6.00526796	4.49759381	2.0583814	0.81318378	5.37354817	1.26524279	1.86117357	6.1605968	1.16710471	2.2797829	3.06438052	4.34854669
TCGA-86-8073-01A	24.31	0	5.8689568	3.7464898	3.4747459	4.7596205	1.1266633	0.9507423	8.0357013	1.2964927	5.4666806	6.1736221	6.1697039	2.1333062	3.1154438	4.0620617
TCGA-86-8074-01A	0.79	0	6.7607197	4.2471296	4.5590319	5.3353644	0.8574865	0.1102034	6.5630793	1.5979666	1.1841974	5.3382389	4.7705203	2.3400113	3.2220149	3.9898525
TCGA-86-8075-01A	22.8	1	6.17899036	4.3903841	3.16831914	4.58346866	0.09545618	0.22079985	7.09640059	1.45733921	2.00585376	5.398057	4.18296219	2.15474892	3.07157009	3.98459343
TCGA-86-8076-01A	32.62	0	6.89653727	3.75768246	2.45945969	4.35854945	2.15231099	0.1135076	6.09021299	0.93381481	1.40886283	6.37067266	2.7179321	2.1845396	3.77493093	4.46239263
TCGA-86-8278-01A	31.01	0	6.14708391	3.55500399	4.38710859	4.87078859	0.09083376	0.46126534	6.65505277	1.06603472	1.19636612	5.21937119	0.99612894	2.90354293	3.18090664	4.14244127
TCGA-86-8279-01A	31.18	0	7.5864466	3.3774948	4.5849755	5.3532357	0.1757678	0.3443659	6.2087638	1.6272602	0.2475587	5.4372091	2.276507	2.9057131	3.6327599	4.0757118
TCGA-86-8280-01A	23.03	0	7.26702934	3.59541202	4.77070657	4.94087575	2.74027994	0.46826973	6.16174343	1.32081715	1.21772876	5.53413688	2.31210043	2.78955595	2.78427419	4.13121296
TCGA-86-8281-01A	0	0	7.4039733	5.098328	5.3363186	5.0014122	0.4363276	0.2364032	8.3490973	0.929738	3.6124453	5.9360246	5.7176369	2.5040082	2.6975174	4.4388369
TCGA-86-8358-01A	21.45	0	6.649521	3.1006084	1.1350421	5.0215814	0.3730378	1.2661427	7.8561376	2.6741591	4.0698354	5.583918	6.9197412	2.8607433	4.355427	5.0079777
TCGA-86-8359-01A	14.59	1	6.09072475	4.51061912	1.95098143	4.63114993	0.23229872	0.05801433	5.63250161	0.79368121	2.12785303	5.11712718	2.17852123	2.63154328	3.12129788	4.66491512
TCGA-86-8585-01A	11.6	0	7.647048	3.5162751	1.6186978	5.3906634	0.3359904	0.1133913	5.7621282	1.9048059	1.5591551	4.7233645	1.8670708	2.9666536	2.251024	4.2432113
TCGA-86-8668-01A	13.9	0	6.99124584	3.50910481	6.16935114	4.15001436	0.59606725	0.98641721	5.24315947	1.2519673	1.56624222	5.54323125	3.13273187	2.83110778	3.1264414	3.63369485
TCGA-86-8669-01A	30.81	0	8.614515	3.7839096	6.3305772	4.6061149	0.5189544	0.7328454	5.2356208	1.0443277	1.2918612	5.505108	2.4399795	2.7123532	2.8271654	4.7863457
TCGA-86-8671-01A	27.56	0	7.1072262	3.5853406	4.8980998	4.7085797	0.216114	0.2765985	5.6256374	1.5005414	1.7613799	5.5517341	2.1279946	2.508038	2.9157841	3.8463342
TCGA-86-8672-01A	0.62	1	6.68873799	4.1975252	1.68680616	5.43847417	0.01395521	0.04538721	7.36500566	1.44877726	3.36840508	5.47474103	6.5081404	2.70608125	3.72062169	4.30443044
TCGA-86-8673-01A	28.32	0	5.81461714	3.77189913	0.69194452	4.35894333	0.11218194	0.07474681	5.38497712	1.33971315	0.96371825	4.94830404	2.21092278	4.84800929	3.22987708	4.44506621
TCGA-86-8674-01A	26.48	0	7.216291	4.2363524	3.416568	5.1755235	1.6348788	0.16874	9.1857456	0.9616284	3.5744156	5.5044744	3.7067818	2.6847043	3.2073663	4.7948592
TCGA-86-A456-01A	29.43	0	7.45520954	3.98458476	5.74979212	5.09156517	0.0336734	0.35416059	6.24228743	1.34572467	1.38478513	5.77629916	2.61495317	3.18591869	3.39242111	4.15544059
TCGA-86-A4D0-01A	3.81	1	8.2836137	4.0275071	3.9895597	4.8900582	1.4158975	0.3769114	7.2496048	2.5322506	4.4100391	5.708751	4.6203943	2.4837163	4.129507	4.8457043
TCGA-86-A4JF-01A	24.21	1	6.1765225	3.9833574	5.8837984	5.8614169	0.1433465	0.1502025	5.4350104	1.5292709	0.5366635	4.8624724	1.4960873	2.7261642	2.6765994	4.6616088
TCGA-86-A4P7-01A	13.63	0	6.9336193	3.968016	4.9025818	4.6725287	0.7011614	0.2725755	5.394946	1.2702333	0.6751948	5.4121102	1.9773065	2.8338268	2.712061	3.7631967
TCGA-86-A4P8-01A	26.45	0	7.2600936	3.570581	3.9045168	4.3077271	1.4513649	0.1609312	5.9906737	1.2259645	1.1018639	5.9633278	2.1175063	2.5093861	2.3877335	3.6322657
TCGA-91-6828-01A	10.61	0	6.9434213	4.3494452	6.0452546	5.8087695	1.3942226	0.627954	5.4388492	1.823251	1.9505261	6.0208752	1.5102377	2.1162546	2.6982634	3.9636292
TCGA-91-6829-01A	41.33	1	6.5475885	3.4355585	5.0441137	4.9094686	0.0814691	0.5158122	6.249982	1.8130474	0.9847985	6.1833582	3.4183893	1.9488706	3.5866783	3.5313512
TCGA-91-6830-01A	1.97	0	7.20106753	3.68821649	3.03053708	5.12697918	1.53428984	0.21009489	6.60781408	1.13250605	2.27282049	6.33318352	3.90308145	2.08144466	3.33286296	4.3265502
TCGA-91-6831-01A	10.18	0	7.95382916	4.22589577	1.32095162	4.9369929	0.80278615	0.3049465	6.2828768	2.52659411	1.47434475	6.18627349	3.5857267	3.13128077	3.74854422	4.99193914
TCGA-91-6835-01A	2.6	0	6.3063902	4.17989696	5.13387717	4.82455264	3.27799926	0.36442534	5.42494523	1.66483262	0.75820936	6.14043962	3.21373593	1.99101176	2.63103338	4.09349623
TCGA-91-6836-01A	13.7	0	7.0338309	4.58475472	4.57470213	5.1835218	0.10798194	0.04536426	5.80690121	2.34448255	2.22513773	5.247789	3.43957868	2.23876257	2.9167513	4.89220573
TCGA-91-6840-01A	12.22	0	7.8999734	3.6242472	1.7353852	4.8493034	1.6807849	0.2682273	5.9837809	1.7415219	0.3202622	6.0040652	2.0601006	2.5962559	2.7175637	4.1626849
TCGA-91-6847-01A	27.66	0	5.3437335	4.8714612	0.2000711	6.4195316	0.4741963	0.1788139	6.6693561	2.3288085	1.6636903	5.7146063	2.9887469	2.1915149	3.3001105	4.3083193
TCGA-91-6848-01A	7.36	0	5.90081019	4.41478227	2.22351093	4.94869085	0.07588638	0.19164832	7.77779128	3.04443098	4.80745804	5.44061488	3.19249531	1.93189947	3.59003434	3.93041595
TCGA-91-6849-01A	1.15	0	6.68347583	4.42064321	2.32657419	5.22851895	1.2818787	0.40256065	7.86040492	0.77893946	4.40839848	5.89500233	4.38319423	2.39044028	2.71563818	4.48873464
TCGA-91-7771-01A	16.16	0	7.1005633	4.31075963	2.93602119	4.53573808	0.38457958	0.42308737	5.89902646	1.00129843	2.48410354	6.82054583	3.01586278	2.19245413	3.26901295	4.26138396
TCGA-91-8496-01A	16.59	0	7.240793943	3.275270246	4.4658158	4.138386966	0.281090914	0.627262311	6.131275776	0.811590188	0.706333595	6.132510121	1.219708429	2.108235189	2.808929821	4.344771362
TCGA-91-8497-01A	14.26	1	7.7456695	3.81972847	4.87075929	4.2850863	1.81641058	0.77485388	5.5780753	1.06949321	2.46414087	5.65956849	1.7571952	2.45262978	3.31778562	4.61582277
TCGA-91-8499-01A	1.18	0	4.4238459	4.40029495	0.83119001	6.41115115	3.74399709	1.20192509	5.79309342	1.91860429	1.42967006	5.30547079	3.37131704	3.11356314	2.91538333	5.11737528
TCGA-91-A4BC-01A	1.45	0	7.5640449	2.7977643	2.3284505	4.707421	0.2676079	0.2324409	5.3788021	2.0902894	0.6557585	4.6832279	2.4219712	3.1862399	2.762503	4.1075772
TCGA-91-A4BD-01A	19.81	0	7.6564915	3.6295704	5.6023123	4.8678181	2.3300258	0.1806453	5.5448004	1.198716	0.4828716	5.2174041	1.0978042	2.947798	3.5860419	4.4654075
TCGA-93-7347-01A	22.44	0	7.74885094	3.75909786	6.73791029	3.87415329	1.80995105	0.72451135	5.65074214	1.44377788	0.96619435	5.95416927	1.32135223	2.27533516	3.6969482	4.25898147
TCGA-93-7348-01A	17.44	0	6.53636787	4.00877899	3.89549319	4.87915746	1.40848239	0.38179404	5.6982109	1.00946685	0.67857099	5.33445476	2.94234689	2.87960642	3.1559886	3.81665088
TCGA-93-8067-01A	6.11	0	6.91806613	5.31085636	2.26765678	5.37066735	2.43223213	0.07424742	8.07462446	1.46796882	4.11963932	5.44061528	5.65200693	2.32511071	2.94285407	4.74092748
TCGA-93-A4JN-01A	23.59	0	6.49147344	3.98621176	4.17147613	5.4665918	0.12647684	0.34041667	5.84293405	1.75810971	0.79683298	5.00883945	2.97220724	3.35031801	2.86552712	3.65272116
TCGA-93-A4JO-01A	1.08	1	6.51111292	3.74566515	3.22068302	5.19266672	1.56883777	0.24299666	5.71613118	1.55351004	0.18628943	5.21383143	3.19578377	3.15899727	2.90806261	4.24104367
TCGA-93-A4JP-01A	18.99	0	6.9125819	3.8666266	2.6327907	5.0800666	1.3730904	0.1185532	5.7185322	1.4052973	0.7872214	5.6797657	2.3580386	2.6762227	2.6520518	3.6980929
TCGA-93-A4JQ-01A	17.28	0	6.5636543	3.7628738	5.0918798	4.9884686	0.4483806	0.2304808	4.8590737	1.8940281	1.8936042	4.9913441	4.4047787	2.6159281	2.8646763	4.6854704
TCGA-95-7039-01A	41.79	0	7.02719828	3.43106968	6.48686403	5.09178418	0.05276417	0.61904861	6.13982887	1.31660251	0.44174749	5.14997417	3.22773312	2.41336383	2.96171474	4.90452535
TCGA-95-7043-01A	16.52	1	7.2213848	3.7729738	0.6925345	5.2488106	0.6536587	0.196137	9.0194063	1.5637122	4.5048136	5.3047084	5.6581489	2.8868179	3.2354437	4.3080864
TCGA-95-7562-01A	2.86	1	6.81040524	4.2721526	3.90021691	5.75725986	1.72721541	0.17633631	6.8954896	2.20174965	0.99894589	5.14616135	4.28733244	2.01760857	3.20282851	4.269113
TCGA-95-7567-01A	18.66	0	7.07988103	4.14088053	3.83259603	5.37007699	0.01709522	0.30851291	6.39173691	1.56394876	0.56792733	6.37970279	0.69891348	2.07619796	3.14011383	4.66512673
TCGA-95-7944-01A	12.39	0	7.35570996	3.26385178	1.00535259	4.98460087	0.05108981	0.13751267	5.47894975	2.20656536	0.50733315	4.83663099	1.41444414	2.51717554	2.69748808	4.88948238
TCGA-95-7947-01A	15.67	0	6.1847627	4.45896431	1.68716119	6.01036428	3.40595348	0.08827458	6.53921879	2.05850009	0.49889578	5.71770364	3.69469466	2.93924568	3.54423988	4.40164362
TCGA-95-7948-01A	15.64	0	8.2121387	3.114222	0.5684611	4.3581485	0.2852973	1.0477025	6.5474888	0.9644773	0.4657514	6.4524917	0.5656577	2.9760849	2.7263074	4.9970988
TCGA-95-8039-01A	27.27	0	6.8965605	3.2352329	5.2713332	5.2179113	0.9678451	0.4021306	6.1103423	1.1945614	0.7135983	5.7338521	1.5106411	2.7955982	3.5791407	4.4797075
TCGA-95-8494-01A	2.76	0	7.05394262	3.72423115	6.6452495	5.57135341	0.2019348	0.08150053	5.38872274	1.66067018	1.85971814	4.93738311	1.6109883	2.74177996	3.02113721	4.32573016
TCGA-95-A4VK-01A	21.39	0	6.67757844	5.18484597	1.42424005	5.26140563	0.2362342	0.30207438	6.55301655	1.8596116	0.76158503	5.3071314	2.55045364	3.4433986	3.13427893	4.22211417
TCGA-95-A4VN-01A	18.17	0	6.42480925	3.86585515	4.85912936	5.1957887	1.22107276	0.19948703	6.09549236	1.96775758	1.09870007	5.90533572	1.50028875	2.78703434	2.40361824	4.6092717
TCGA-95-A4VP-01A	19.88	0	7.799193	3.786381	4.0440216	4.9150736	0.2363297	0.1158427	4.7451899	1.2551782	1.8871171	4.7807002	1.5422751	3.5175217	3.2567918	4.6337192
TCGA-97-7546-01A	42.21	0	7.4889329	4.3842826	5.9627249	4.2203643	0.3189496	0.5449046	5.342942	1.1567435	0.99414	5.9461912	2.2153386	2.5317439	3.0053436	3.817036
TCGA-97-7547-01A	64.55	0	6.7719982	4.61035675	6.54601682	4.42417025	2.50842708	0.47528617	5.30835741	0.81120401	2.89118867	5.66491496	2.11117299	1.91786705	2.38154154	4.43011672
TCGA-97-7552-01A	63.47	0	7.04821716	4.41053676	3.18292148	4.47778994	3.73278903	0.15949448	5.40990661	1.24477932	2.05432459	6.5194006	2.69631825	1.72565286	2.95663869	3.9407825
TCGA-97-7553-01A	61.43	0	6.9359425	3.8819785	3.9818072	4.7208101	1.4266535	0.1402675	6.2495244	1.4365851	1.0975001	6.4652949	3.0354808	1.8796533	2.9053137	3.9968212
TCGA-97-7554-01A	25.46	0	6.4326293	3.5235423	6.8634526	4.4449034	0.2005295	0.3049245	5.6423077	1.1887898	0.3726414	5.7996142	1.7763406	1.7193915	3.1793731	3.8754728
TCGA-97-7937-01A	18.53	0	7.62535443	4.7881977	5.22239384	5.1670435	0.05436322	0.53699438	5.82799756	1.52443035	0.4292808	5.2518993	1.7230737	2.95360096	2.95087977	4.3198458
TCGA-97-7938-01A	0.59	1	7.6544225	4.1366331	7.0649774	4.2862967	0.9227295	0.5971928	4.8429842	0.9358821	0.3102365	6.1620862	1.9746773	1.9675983	2.6722117	4.1805234
TCGA-97-7941-01A	15.9	0	7.04613405	3.41522414	3.25598601	5.05153622	2.63349513	0.32041054	6.82439634	1.10045503	3.76842385	5.64419609	3.63961512	2.71377249	3.07672136	4.33759959
TCGA-97-8171-01A	18.66	0	7.58838902	3.1096955	3.04682814	4.89536759	0.0198573	0.47232963	5.3020393	1.70088393	0.79893046	6.25593788	0.36254433	2.62689097	2.34209193	4.34021477
TCGA-97-8172-01A	17.9	0	7.1882311	3.9751083	3.9242855	5.4833909	0.3503602	0.4579432	5.0450068	1.3505948	0.9311123	5.8355725	1.6270875	2.8127205	2.8733085	3.8022531
TCGA-97-8174-01A	5.39	1	7.32143716	4.96819633	3.2055413	3.86305592	0.24144371	0.49685901	6.22995439	1.0672728	1.50767242	6.13511417	2.67258375	2.02950201	2.23682956	3.80163565
TCGA-97-8175-01A	18.1	0	6.82739484	3.52477262	4.95495748	5.50982433	0.09297413	0.14983001	5.42379878	1.62074763	1.78182334	4.62611159	2.90808514	1.97788786	2.53102924	4.6947957
TCGA-97-8176-01A	15.37	1	6.82721796	4.35324954	2.33725316	5.33874454	0.90944256	0.19459127	8.46446881	2.5404373	4.35443456	5.45961419	4.59007348	2.59333988	3.15934475	4.91323931
TCGA-97-8177-01A	16.39	0	7.6757481	3.7649391	5.3865811	5.3705502	0.341411	0.5215768	5.6836137	0.8233703	0.4474947	5.6794141	2.6373541	2.4641474	3.4917546	5.0333631
TCGA-97-8179-01A	14.29	0	7.157731	3.9649318	4.0855316	5.4251387	0.2579589	0.3119805	7.2252104	1.5504294	3.5719926	5.7357469	4.5901615	3.1829392	3.4213089	4.0728406
TCGA-97-8547-01A	21.58	0	7.0309937	2.82417432	6.37920133	4.88000612	0.08117517	0.6946726	5.72915276	1.45222838	1.93189683	4.94984434	3.08946228	2.41512328	2.99576509	4.17841122
TCGA-97-8552-01A	20.57	0	7.21470697	3.35399056	3.65459167	4.66943982	4.78010721	1.01729111	5.71785668	0.99548245	0.95109578	5.33694693	2.14157636	3.17441479	2.90027416	3.73572549
TCGA-97-A4LX-01A	20.17	0	6.9534327	3.6808972	5.1084788	4.850617	0.7110248	0.332575	6.1042134	1.5333256	0.3129723	5.5716932	2.3088723	2.7880148	2.4676484	4.3674561
TCGA-97-A4M0-01A	21.42	0	6.8560809	3.5601672	6.0732942	4.5562219	0.3619449	0.5058679	5.3657428	1.4466963	0.1438291	5.5789553	0.902869	3.0612136	2.7283916	4.1356658
TCGA-97-A4M1-01A	19.74	0	7.6934919	3.3908083	4.8843159	5.13867	0.8473847	0.4181957	5.9662826	0.9961357	0.2413842	5.0962226	1.1831323	3.2320372	2.6777624	3.942623
TCGA-97-A4M2-01A	20.5	0	7.3988031	3.8910833	2.8613965	4.8406775	2.7111	0.3682505	6.3859199	1.2520517	1.0730718	5.8724834	2.696365	2.8057917	3.0933483	4.0064159
TCGA-97-A4M3-01A	17.74	0	7.3273608	4.2172904	2.31984	4.4070071	0.1041294	0.4958644	8.6507238	0.8747878	5.1221266	5.2050976	4.1750633	2.6781609	2.6516016	4.8382864
TCGA-97-A4M5-01A	20.83	0	6.93615771	4.63933396	2.727976	4.63705421	3.53481327	0.20037985	6.39237518	1.02381331	5.59287171	5.88048507	2.20753103	2.43888504	2.91540595	4.53259741
TCGA-97-A4M6-01A	18.66	0	6.9334008	3.4583962	5.1420053	5.4085472	0.7488842	0.7875325	7.2470734	1.273211	1.7255122	5.6778512	2.9420095	3.2231032	3.7250933	4.0295951
TCGA-97-A4M7-01A	20.66	0	6.90757328	3.55304555	4.8521089	5.00569886	3.40193563	0.60858996	5.91927708	1.25253385	0.77993806	5.1573923	1.91405808	2.96012303	2.57703469	3.86079948
TCGA-99-7458-01A	24.54	0	6.51628937	3.51516712	6.78417955	3.85143488	1.57417327	0.22456592	5.19556223	1.15978417	1.36377382	5.77289782	2.86488759	1.95731245	2.94834001	3.82630427
TCGA-99-8025-01A	34.82	0	6.8853729	3.67148517	3.54450834	4.496049	3.29111952	0.26519991	6.34968907	1.35390112	1.00023375	5.28793608	1.46060864	2.71199665	3.33997993	4.34240846
TCGA-99-8028-01A	36.73	0	7.06150083	3.56550373	5.34783168	4.98355146	0.95555106	0.05061461	5.80747376	1.17187325	0.40264799	5.32955848	2.67084639	2.41400862	2.87954299	4.23565119
TCGA-99-8032-01A	1.45	0	7.671431	3.9092381	4.9832692	4.5965368	0.6498019	0.3468961	5.6328879	1.6082834	2.2226816	5.2264303	3.007093	2.5483781	3.6828762	4.8933105
TCGA-99-8033-01A	21.55	1	6.4930514	4.78166707	2.07747924	5.16358015	0.02809522	0.13779661	7.96832917	1.78781147	4.21814647	5.36950109	5.3568569	2.90080312	3.59986258	4.99980153
TCGA-99-AA5R-01A	21.62	0	7.36823834	3.31805466	2.88205361	4.61215752	0.08901097	0.14356116	5.65554382	1.27286526	0.29525556	5.34410401	1.91138677	2.65579884	2.61410361	3.67576637
TCGA-J2-8192-01A	24.28	0	7.09303027	3.89852273	5.15284576	4.76838605	0.48239707	0.32289811	5.87229634	1.04514026	1.1265517	5.77649148	3.02021549	2.24182539	3.15630027	4.05864993
TCGA-J2-8194-01A	23.78	0	7.063016	4.1877372	3.7341602	4.5602387	0.3813625	0.1852027	7.3352236	0.7459135	3.6942764	6.1494789	4.804622	2.0191171	3.6034367	4.5551519
TCGA-J2-A4AD-01A	18.07	1	6.3370986	3.9380696	1.5939705	5.8251751	2.1553886	0.2483434	7.0578176	2.1309309	2.751817	5.369206	6.641275	3.2593856	3.387415	4.3823994
TCGA-J2-A4AE-01A	35.45	0	7.2397951	3.7070286	4.1566285	4.8048273	2.2431838	0.3696767	5.234126	2.0417774	3.0700972	5.2864387	2.2327883	3.20441	3.3839396	3.9653023
TCGA-J2-A4AG-01A	32.46	0	7.34133734	4.43883944	6.02003865	4.72643352	0.10008071	0.17787889	5.16959485	0.9659962	1.59978653	5.17931617	2.44867478	3.11190564	3.39233319	4.13766255
TCGA-L4-A4E5-01A	18.99	0	6.4695332	2.4327461	4.6251776	5.101832	0.5445254	0.3734338	6.1621011	1.9903534	0.7008478	5.1449663	2.8240272	3.7813702	3.0327239	3.3752729
TCGA-L4-A4E6-01A	14.29	0	7.03694251	3.65814806	4.84299873	4.60390374	0.11851792	0.0760653	5.63365205	1.06657761	0.50189348	6.24377089	1.62518261	2.49560622	2.61450303	3.98702344
TCGA-L9-A443-01A	6.34	1	6.91388222	3.49064819	6.02276683	4.5174018	2.4688771	0.38475679	4.64329301	1.48580771	0.65031554	5.30944348	1.78770144	3.31568668	3.20509509	3.8950496
TCGA-L9-A444-01A	10.09	0	6.6619871	2.9485595	5.4958751	5.2389922	0.2982279	0.2123348	5.4098464	1.8969973	0.2485621	5.0095792	2.6446931	2.9733916	2.4560216	3.847212
TCGA-L9-A50W-01A	14.52	1	7.59436102	4.05466749	5.72625515	5.20242475	0.12697571	0.44502061	5.51298273	0.86252806	1.61015202	5.54336239	1.82584192	2.80471935	3.21635278	3.84264192
TCGA-L9-A5IP-01A	1.91	1	6.317232512	4.619582892	1.508782736	4.633638293	0.263958129	0.070977039	7.610769303	1.946747758	4.989935835	5.492274699	3.232064073	2.483783746	3.545716791	5.495039504
TCGA-L9-A743-01A	21.81	0	6.9448932	3.38399	5.3839167	5.0383232	2.6446684	0.2967906	5.5698323	1.8696196	0.669637	5.3105687	2.1909252	2.6342067	3.0911931	4.6073368
TCGA-L9-A7SV-01A	18.56	0	7.3832879	2.6909423	6.7794938	4.6758697	0.4284565	0.9126099	5.7967181	1.6012464	0.3710137	6.0698119	3.3836414	3.2170289	3.7752623	4.0859797
TCGA-L9-A8F4-01A	15.64	0	6.8411191	3.762941	0.7609246	4.8240702	0.3852036	0.2392451	5.7806115	3.523444	0.3735136	5.4155934	2.7570306	3.0997887	2.498473	4.5965213
TCGA-MN-A4N1-01A	27.17	0	6.46636342	3.75875439	4.82312546	5.77620892	0.07120628	0.32672326	6.13529689	1.5167861	2.63553505	4.2572162	2.80290948	3.44566061	3.24686522	4.83226328
TCGA-MN-A4N4-01A	38.6	0	6.6835938	3.8346169	3.2241383	5.1867064	0.9728373	0.1091758	6.0870277	1.1805876	1.7153844	5.3047075	3.1543458	3.7811961	2.9589799	3.5704467
TCGA-MN-A4N5-01A	2.76	0	6.0420014	3.323669	6.7358315	4.9021104	0.8777504	0.2410531	5.5056421	2.2175621	0.3880173	4.915245	1.7701994	3.3716496	2.5549126	4.1048227
TCGA-MP-A4SV-01A	86.07	1	6.88252997	3.72071664	5.96375718	5.42148936	0.93319066	0.85593234	5.58931672	1.89336839	0.98770099	5.53004955	1.38439022	3.03224095	3.23121341	4.24155014
TCGA-MP-A4SW-01A	58.41	1	6.6263821	3.745321	6.0639229	5.1267707	0.8672264	0.2212124	6.412812	1.7269441	1.1854706	5.4793461	2.72446	3.5324664	3.1465829	4.1656741
TCGA-MP-A4SY-01A	49.31	1	6.6355969	3.1527839	5.0667623	5.1383022	1.4898947	0.6033057	5.8961934	1.4799324	2.4317321	5.0041974	2.5409997	2.7542961	2.4882481	4.0810415
TCGA-MP-A4T4-01A	85.97	1	6.5789926	3.7820003	5.2757576	5.4349788	2.4037295	0.1303985	5.7822117	1.6843857	1.2701901	5.6935162	3.1005335	2.8514149	2.8548836	3.8568881
TCGA-MP-A4T6-01A	58.8	1	7.3795556	3.39675754	4.18814866	5.65088283	0.74951784	0.71530674	5.70359036	1.07820038	0.70872142	4.56605444	2.80402502	4.07605344	2.08844002	3.76994761
TCGA-MP-A4T7-01A	5.49	1	7.3702512	4.477764	2.9873873	5.2915153	0.3087308	0.20094	6.7654629	1.8923193	2.9865358	5.5568909	3.6983454	2.8493871	3.8091083	5.0012884
TCGA-MP-A4T8-01A	5.29	1	7.2617699	4.024853	1.9084269	4.9830323	0.3190697	0.344509	6.1399614	1.3214658	1.2919186	5.3414575	2.0052526	2.7394811	3.4674713	4.1556873
TCGA-MP-A4T9-01A	41.56	1	6.6551534	3.319973	4.6834851	5.1910809	1.4259919	0.1199161	5.7631569	1.2454086	0.8212823	5.5843999	1.959223	2.7977142	2.737045	4.1064277
TCGA-MP-A4TA-01A	31.21	1	6.95316759	4.99148882	1.78596204	6.24147456	0.05807541	0.27767538	6.42767866	2.13118468	2.38538015	5.06275811	5.47952702	3.45899224	3.76242267	4.88383166
TCGA-MP-A4TC-01A	2.43	1	6.43680385	4.66748132	4.41514295	5.23830869	0.03482398	0.17701587	5.78496903	1.44218445	1.32088551	4.91729603	3.05251161	2.80052223	3.33269315	4.10414633
TCGA-MP-A4TD-01A	10.09	1	7.5677537	3.5031712	3.6421218	4.9373959	0.949534	0.3007785	6.013279	1.1662993	3.3416733	5.0028768	3.2993265	2.9456001	3.5432343	4.156639
TCGA-MP-A4TE-01A	29.43	1	7.99923867	3.29132623	5.71965541	4.8900386	0.85000965	0.49514197	6.44417611	0.99398636	2.47837674	5.25494044	3.50537359	2.23441393	3.38263038	4.8711085
TCGA-MP-A4TF-01A	11.04	1	4.23401206	5.21934157	2.11882226	5.24465331	0.02817122	0.12320373	6.14160664	1.36642854	2.41660301	4.98481891	2.26275931	3.28954425	2.54591176	4.34552982
TCGA-MP-A4TH-01A	24.34	0	7.25031623	4.49046917	2.13426111	4.96988292	0.31710885	0.24167448	5.17728806	1.30960611	0.51344705	5.93709251	1.72278847	2.7151491	2.86948191	3.68455729
TCGA-MP-A4TI-01A	14.09	1	6.46078924	3.38838415	2.76645935	4.71169209	0.04827587	0.12368075	6.16583692	2.19388525	0.98723875	5.54104139	2.66587705	2.53080308	3.24267648	4.36954166
TCGA-MP-A4TJ-01A	11.14	1	6.74172033	4.1841504	3.53234757	4.74787829	3.28776092	0.31679079	5.74563617	1.68060051	1.36205456	5.63184943	2.28261653	2.46957963	2.91719391	4.12865673
TCGA-MP-A4TK-01A	19.12	1	6.5205063	3.16146807	4.43744148	4.91338937	0.03684222	0.12481153	5.51339354	2.26514484	1.07040677	5.05804144	2.88110632	2.89365387	2.7965807	4.38957166
TCGA-MP-A5C7-01A	73.85	0	8.06236984	4.31858214	2.25020153	5.03138718	0.05568642	0.8322272	7.97866153	1.21109274	4.36621073	5.76116837	4.33899142	2.73061544	3.0586848	4.05301995
TCGA-NJ-A4YF-01A	70.99	0	8.1444467	3.7583515	0.7669354	5.1775232	2.1947876	0.1252589	5.5765137	1.7332948	0.2499314	5.9483182	1.9531294	3.3121148	3.63991	5.6011016
TCGA-NJ-A4YG-01A	74.28	0	7.44495871	3.40286578	6.27043711	4.53795557	0.02039829	0.27583294	6.18844731	1.41948894	1.02520996	5.15539171	0.85175987	3.29537273	2.74791331	4.08713753
TCGA-NJ-A4YI-01A	0.13	1	6.6757861	3.5703731	6.3238024	4.8026808	0.6172157	0.2369895	5.8378691	1.1414208	0.410297	4.7140171	1.8431516	3.1842315	2.0068163	3.9561116
TCGA-NJ-A4YP-01A	1.64	0	6.334417077	4.050054837	1.661274423	4.949061472	0.004043545	0.080902411	6.496511818	1.514259682	2.075662821	5.789703429	1.970624528	2.860965487	3.199482689	4.354458946
TCGA-NJ-A4YQ-01A	47.04	0	6.756385	4.8405094	1.1684483	5.6584793	0.1171737	0.1340496	7.946432	1.3776806	1.1200345	5.4005887	5.7146944	3.1992632	2.7013407	4.1675375
TCGA-NJ-A55A-01A	0.49	0	7.10672029	3.72216929	4.59212785	4.68970222	6.84561395	0.55406977	4.94570694	1.56907301	0.46384224	5.60444754	3.28966371	2.66320862	3.00044067	3.80790422
TCGA-NJ-A55O-01A	0.43	0	6.59856035	4.3485212	4.19652521	4.512413	0.10038271	0.16152198	6.24682033	0.90719043	1.93273656	5.65068869	1.86178568	2.33175732	2.93291378	4.27986506
TCGA-NJ-A55R-01A	19.81	0	7.28670322	4.29322975	5.32412791	5.22051482	0.1410326	1.02175225	7.4450409	1.46264107	3.20123795	4.96332042	3.98702152	2.78888031	3.10260116	4.61276346
TCGA-NJ-A7XG-01A	20.27	0	6.9715318	3.6214364	4.5193282	4.7340761	0.1121771	0.6892527	5.2016494	1.0232673	1.8710676	5.1094387	0.4138081	3.3420047	2.8032075	4.1912305
TCGA-O1-A52J-01A	59.07	1	8.10736625	3.2700299	5.50653183	4.93837429	0.26758593	1.80636381	5.75507954	1.54198661	0.03110601	5.4296013	1.35748853	3.37977556	2.77909639	3.68162175
TCGA-S2-AA1A-01A	16.85	0	6.53632113	3.47876092	2.60256409	4.79547775	1.45862036	0.18464936	5.16574008	1.32745837	0.87910107	5.52284911	2.03982297	2.78597885	2.78783089	3.74268381
